**Endophilin A1 promotes Actin Polymerization in response to Ca<sup>2+</sup>/calmodulin to Initiate Structural Plasticity of Dendritic Spines**

Yanrui Yang<sup>1,2,\*</sup>, Jiang Chen<sup>3†</sup>, Xue Chen<sup>1,2</sup>, Di Li<sup>4</sup>, Jianfeng He<sup>5</sup>, Shun Zhao<sup>6</sup>, Xiaoyu Yang<sup>6</sup>,  
Shikung Deng<sup>1,2</sup>, Dou Wang<sup>1</sup>, Zhenzhen Guo<sup>1,2</sup>, Shaoxia Zhu<sup>1</sup>, Dong Li<sup>4</sup>, Cong Ma<sup>6</sup>, Xin  
Liang<sup>5</sup>, Yun S. Shi<sup>3</sup> and Jia-Jia Liu<sup>1,2,7\*</sup>

<sup>1</sup>State Key Laboratory of Molecular Developmental Biology, Institute of Genetics and Developmental Biology, Innovation Academy for Seed Design, Chinese Academy of Sciences, Beijing 100101, China

<sup>2</sup>College of Life Sciences, University of Chinese Academy of Sciences, Beijing 100039, China

<sup>3</sup>State Key Laboratory of Pharmaceutical Biotechnology and MOE Key Laboratory of Model Animal for Disease Study, Model Animal Research Center of Nanjing University, Nanjing, China

<sup>4</sup>National Laboratory of Biomacromolecules, CAS Center for Excellence in Biomacromolecules, Institute of Biophysics, Chinese Academy of Sciences, Beijing, 100101, China.

<sup>5</sup>Tsinghua-Peking Center for Life Sciences, School of Life Sciences, Tsinghua University, Beijing 100084, China

<sup>6</sup>Key Laboratory of Molecular Biophysics of the Ministry of Education, College of Life Science and Technology, Huazhong University of Science and Technology, Wuhan 430074,

China

<sup>7</sup>CAS Center for Excellence in Brain Science and Intelligence Technology, Chinese Academy  
of Sciences, Shanghai 200031, China

<sup>†</sup>These authors contributed equally to this work.

\* **Correspondence:** [yryang@genetics.ac.cn](mailto:yryang@genetics.ac.cn), [jjliu@genetics.ac.cn](mailto:jjliu@genetics.ac.cn)

## **Abstract**

Dendritic spines of excitatory neurons undergo activity-dependent structural and functional plasticity, which are cellular correlates of learning and memory. However, mechanisms underlying the rapid morphological changes immediately after NMDAR-mediated  $\text{Ca}^{2+}$  influx into spines remain poorly understood. Here we report that endophilin A1, a neuronal N-BAR protein, orchestrates membrane dynamics with actin polymerization to initiate spine enlargement in the induction phase of long-term potentiation (LTP). Upon LTP induction,  $\text{Ca}^{2+}$ /calmodulin enhances its binding to both membrane and p140Cap, a cytoskeleton regulator. As a result, endophilin A1 rapidly associates with the relaxed plasma membrane and promotes actin polymerization, leading to acute expansion of spine head. Moreover, not only the p140Cap-binding, but also calmodulin- and membrane-binding capacities of endophilin A1 are required for LTP and long-term memory. Thus, endophilin A1 functions as calmodulin effector to drive spine enlargement in response to  $\text{Ca}^{2+}$  influx in the initial phase of structural plasticity.

**Keywords:** endophilin A1; calcium; calmodulin; dendritic spines; synaptic plasticity; actin polymerization; membrane expansion

## 1 **Introduction**

2 Long-term potentiation (LTP) of synaptic strength contributes to neural mechanisms  
3 underlying learning and memory (Nabavi et al., 2014). In the mammalian brain, most  
4 glutamatergic synapses are located on dendritic spines, micron-sized protrusions from  
5 dendrites. In response to input activity, spines undergo changes in both morphology  
6 (structural plasticity) and function (functional plasticity), which are tightly correlated during  
7 LTP (Harvey and Svoboda, 2007; Matsuzaki et al., 2001; Matsuzaki et al., 2004). Imaging  
8 studies have revealed that induction of LTP triggers a large transient increase in spine volume  
9 (1-5 min after stimulation, early or transient phase) that decays to a long-lasting spine size  
10 expansion (> 40 min, late or sustained phase) (Harvey and Svoboda, 2007; Matsuzaki et al.,  
11 2004), a process termed structural LTP (sLTP), which would allow physical enlargement of  
12 glutamatergic synapses to accommodate more  
13  $\alpha$ -amino-3-hydroxy-5-methyl-4-isoxazolepropionic acid receptors (AMPA) for synaptic  
14 potentiation (Herring and Nicoll, 2016). Moreover, recent studies have established a direct  
15 link between spine morphological changes and memory trace *in vivo* by demonstrating  
16 disruption of acquired motor learning by optical shrinkage of potentiated spines in the motor  
17 cortex (Hayashi-Takagi et al., 2015). Although sLTP has been studied intensively, with  
18 calcium signaling-regulated actin remodeling being the central process that governs the  
19 stabilization and consolidation of spine enlargement (Nakahata and Yasuda, 2018),  
20 mechanism(s) initiating rapid spine head expansion remains largely unexplored due to limited  
21 spatiotemporal resolution of the molecular events in the acute phase (0-1 min) of LTP  
22 induction.

23 Endophilin A1 is a member of the endophilin A protein family characterized by an  
24 N-terminal BIN/amphiphysin/Rvs (BAR) domain and a C-terminal Src homology 3 (SH3)  
25 domain. The gene encoding endophilin A1 (*EEN1*, a.k.a *sh3gl2*) is almost exclusively  
26 expressed in brain (Ringstad et al., 1997) and has been implicated in epilepsy, Alzheimer's  
27 disease and schizophrenia (Corponi et al., 2019; Ren et al., 2008; Yu et al., 2018a; Yu et al.,  
28 2018b). Originally identified as a component of the endocytic machinery, endophilin As  
29 function in synaptic vesicle recycling at the presynaptic site in two distinct processes: ultrafast  
30 endocytosis from the plasma membrane following synaptic vesicle fusion and clathrin  
31 uncoating of regenerated synaptic vesicles (Milosevic et al., 2011; Ringstad et al., 1997;  
32 Schuske et al., 2003; Verstreken et al., 2003; Watanabe et al., 2018). Recently endophilin A2  
33 has also been found to mediate fast clathrin-independent endocytosis in mammalian epithelial  
34 cells (Boucrot et al., 2015; Renard et al., 2015). Other studies have implicated endophilin As  
35 in autophagosome formation and protein homeostasis at presynaptic terminals (Murdoch et al.,  
36 2016; Soukup et al., 2016). In dendrites, both endophilin A2 and A3 interact with Arc/Arg3.1  
37 to accelerate endocytosis of AMPARs at the postsynaptic membrane during late-phase  
38 synaptic plasticity (Chowdhury et al., 2006).

39 Previously we found that during synaptic development, endophilin A1 contributes to  
40 dendritic spine morphogenesis and stabilization through interaction with p140Cap, an actin  
41 cytoskeleton regulator (Yang et al., 2015). We also found that *EEN1* gene knockout (KO) in  
42 the hippocampal CA1 region of mouse brain causes impairment of LTP of the Schaffer  
43 collateral-CA1 pathway and long-term memory (Yang et al., 2018). At the cellular level,  
44 endophilin A1, not A2 or A3, is required for N-methyl-D-aspartate receptor

45 (NMDAR)-mediated synaptic potentiation of dendritic spines in mature CA1 pyramidal cells  
46 (Yang et al., 2018). Intriguingly, overexpression of p140Cap, its downstream effector, fails to  
47 rescue the structural and functional plasticity of spines in *EENI* KO (*EENI*<sup>-/-</sup>) neurons (Yang  
48 et al., 2018), suggesting the necessity of spatiotemporal coordination of membrane expansion  
49 and actin polymerization during synaptic potentiation. In this study, we investigated the  
50 mechanistic role(s) of endophilin A1 in sLTP with a combination of cell biological,  
51 biochemical, electrophysiological and genetic approaches. We present evidence that  
52 endophilin A1 serves as an immediate effector of Ca<sup>2+</sup>/calmodulin to promote actin  
53 polymerization-dependent membrane expansion in the initial phase of spine structural  
54 plasticity.

55

## 56 **Results**

### 57 **Endophilin A1 is Required for the Acute Structural Plasticity of Dendritic Spines**

58 Knockout of the *EENI* gene causes inhibition of structural and functional plasticity of  
59 dendritic spines in hippocampal neurons (Yang et al., 2018). To investigate the mechanistic  
60 role(s) of endophilin A1 in synaptic plasticity, first we determined at which temporal stage(s)  
61 of LTP it functions by rescuing the morphological phenotype of *EENI* KO neurons with  
62 overexpressed endophilin A1 in the induction phase of chemically-induced LTP (cLTP)  
63 (Figure 1A). Quantification of spine size indicated that endophilin A1 is required for spine  
64 enlargement as early as 1 minute after application of the NMDAR co-agonist glycine (Figure  
65 1B and 1C).

66 Actin polymerization in dendritic spines is crucial for not only spine morphogenesis

67 during synaptic development but also sLTP of mature neurons. Imaging studies on  
68 hippocampal neurons have shown that actin polymerization in spines starts as early as 20 s  
69 after LTP induction (Okamoto et al., 2004). As endophilin A1 is required for acute  
70 LTP-induced spine enlargement, we reasoned that it might function to promote actin  
71 polymerization in the initial phase of structural plasticity. To monitor morphological changes  
72 and actin dynamics of spines simultaneously, we performed super-resolution live imaging of  
73 *EENI* wild-type (WT) and KO neurons expressing membrane-anchored GFP (mGFP) and the  
74 F-actin probe LifeAct-mCherry by Grazing Incidence Structured Illumination Microscopy  
75 (GI-SIM) (Guo et al., 2018). In WT neurons, consistent with our previous study (Guo et al.,  
76 2018), we observed rapid increase in both spine size and F-actin signal intensity in dendritic  
77 spines within 1 minute upon glycine application (Video 1 and Figure 1D-1F). In contrast, no  
78 significant changes in spine size were detected in *EENI* KO neurons even though the shape of  
79 spines changed constantly (Video 2, Figure 1D and 1E). These live imaging data indicate that  
80 endophilin A1 is required for spine head enlargement during the initial phase of sLTP. Notably,  
81 although the spine heads of *EENI* KO neurons were as motile as those of WT cells, the  
82 LTP-induced net increase in F-actin content was also abolished (Figure 1D and 1F), indicating  
83 that endophilin A1 is also required for spine actin polymerization in the initial phase of sLTP.

84 Consistent with previous findings (Guo et al., 2018; Honkura et al., 2008), we observed  
85 membrane expansion of spine head accompanied by local increase in F-actin content in the  
86 initial phase of sLTP (Figure 1G and Video 1). Quantitative analysis of the images clearly  
87 revealed that actin polymerization and plasma membrane protrusion of spine head are tightly  
88 coupled spatially and temporally (Figure 1H-K and Video 3), suggesting that local actin

89 polymerization provides propulsive force for spine growth. Notably, compared with WT, the  
90 membrane protrusion of spine head and increase in F-actin content was much less coupled in  
91 *EEN1* KO neurons (Figure 1H-1K and Video 4), implicating endophilin A1 in actin  
92 polymerization-dependent membrane expansion in the initial phase of sLTP.

93

#### 94 **Membrane Unfolding and Branched Actin Polymerization are Required for Acute** 95 **Structural Plasticity**

96 The observation that endophilin A1 is required for rapid spine membrane expansion upon  
97 glycine application prompted us to investigate mechanism(s) underlying initiation of sLTP.  
98 Although it was postulated that the membrane source for LTP-induced spine enlargement  
99 comes from transport of intracellular recycling endosomes to the neuronal plasma membrane  
100 (Park et al., 2004), imaging studies revealed that spine head expansion precedes most of the  
101 AMPAR exocytotic events during the early phase of cLTP (Kopeck et al., 2006), and that the  
102 light chain of botulinum toxin type B (BoTox), a neurotoxin that binds to the SNARE  
103 complex and inhibits exocytosis, had no effect on the initial spine expansion after the theta  
104 burst paring protocol of LTP induction (Yang et al., 2008). To determine whether spine  
105 membrane expansion requires fusion of exocytosed vesicles with the plasma membrane in  
106 cLTP, we tested the effect of Tetanus toxin (TeTx), another inhibitor of SNARE-mediated  
107 membrane fusion, on glycine-induced acute increase in spine size. Consistent with previous  
108 studies (Hiester et al., 2018), treatment of hippocampal neurons with TeTx did not affect spine  
109 enlargement in the first 3 minutes of glycine treatment (Figure 2A and 2B), indicating that  
110 vesicle fusion is not the direct source of membrane supply for the rapid structural expansion



111 of spines in the initial phase of sLTP.

112 Both electron microscopy and super-resolution imaging reveal that the surface of mature  
113 spines is not smooth but rather convoluted (Arellano et al., 2007; Harris and Stevens, 1989;  
114 Smith et al., 2014). To determine whether the membrane folds or invaginations in spine head  
115 contribute to structural expansion, we increased membrane tension by exposing neurons to  
116 hypo-osmotic buffer and found that cLTP-induced spine enlargement was abolished (Figure  
117 2C and 2D). As membrane tension increases fusion efficiency (Kliesch et al., 2017), these  
118 findings corroborate that membrane fusion does not contribute to rapid spine enlargement.  
119 Conversely, incubation of neurons with hyper-osmotic buffer, which shrunk the spines and  
120 generated membrane folds, also antagonized cLTP-induced spine enlargement (Figure 2C and  
121 2D). These data together indicate that, similar to the formation of membrane expansion in  
122 migrating primordial germ cells (Goudarzi et al., 2017), the membrane supply for rapid spine  
123 enlargement in the initial phase of sLTP comes from plasma membrane invaginations, which  
124 are local unfolding of spine surface convolutions.

125 Previous studies on activity-dependent structural remodeling of dendritic spines indicate  
126 that glutamate uncaging-induced rapid spine enlargement requires NMDAR, calmodulin and  
127 actin polymerization, whereas long-lasting spine enlargement also requires the activity of  
128  $\text{Ca}^{2+}$ /calmodulin-dependent protein kinase II (CaMKII) (Matsuzaki et al., 2004). Indeed,  
129 inhibition of calmodulin but not CaMKII abolished glycine-induced spine enlargement of  
130 hippocampal neurons during the initial phase of sLTP (Figure 2E and 2F). The  
131  $\text{Ca}^{2+}$ /calmodulin-CaMKII pathway triggers several signaling cascades to promote actin  
132 polymerization and AMPAR trafficking to the plasma membrane during synaptic potentiation

133 (Murakoshi and Yasuda, 2012). In line with previous studies (Honkura et al., 2008; Matsuzaki  
134 et al., 2004), inhibition of actin polymerization with latrunculin A (LatA) abolished  
135 enlargement of spine head during the initial phase of sLTP (Figure 2G and 2H). Moreover,  
136 inhibition of Arp2/3 had a similar effect to that of LatA, whereas inhibition of Formin had no  
137 effect (Figure 2G and 2H), indicating that branched rather than linear actin polymerization is  
138 required for acute spine expansion.

139 The Rho family members of small GTPases are known downstream effectors of  
140  $\text{Ca}^{2+}$ /calmodulin and regulators of actin reorganization and structural plasticity (Hedrick and  
141 Yasuda, 2017; Spiering and Hodgson, 2011). Next we determined whether they are required  
142 for cLTP-induced acute spine enlargement by treating hippocampal neurons with inhibitor for  
143 RhoA, Rac1 or Cdc42. In agreement with previous findings that rapid structural remodeling  
144 requires actin severing and nucleation by ADF/cofilin, inhibition of RhoA, the upstream  
145 activator of ADF/cofilin (Hedrick et al., 2016; Murakoshi et al., 2011), abolished  
146 glycine-induced spine enlargement (Figure 2G and 2H). Notably, although both Rac1 and  
147 Cdc42 can activate actin polymerization (Hedrick and Yasuda, 2017), only Rac1 is required  
148 for the initial spine growth of sLTP (Hedrick et al., 2016; Murakoshi et al., 2011) (Figure 2G  
149 and 2H, this study). Moreover, inhibition of Rac1 only partially inhibited acute spine  
150 expansion (Figure 2G and 2H), suggesting the presence of other factor(s) that promotes  
151 branched actin polymerization in response to  $\text{Ca}^{2+}$  influx immediately upon sLTP induction.  
152 Collectively, these data indicate that  $\text{Ca}^{2+}$ /calmodulin-regulated branched actin polymerization  
153 plays an essential role in acute spine membrane expansion in the initial phase of sLTP.

154

155 **Ca<sup>2+</sup>/calmodulin Enhances Endophilin A1-p140Cap Interaction to Promote Actin**

156 **Polymerization in Spines**

157 Having established that endophilin A1 is required for both spine head enlargement and actin  
158 polymerization in the initial phase of sLTP, we speculated that endophilin A1 promotes actin  
159 polymerization in spines to provide pushing force for membrane expansion. Since CaMKII is  
160 not required for acute spine enlargement, we reasoned that endophilin A1 might function  
161 earlier than CaMKII in molecular events triggered by NMDAR-mediated Ca<sup>2+</sup> influx upon  
162 LTP induction. Previously studies reported that Ca<sup>2+</sup> binding changes the conformation of  
163 endophilin A2 and regulates its interaction with dynamin and voltage-gated Ca<sup>2+</sup> channels  
164 (VGCC) (Chen et al., 2003). Nevertheless, no direct binding between endophilin A1 and Ca<sup>2+</sup>  
165 was detected by isothermal titration calorimetry (ITC) and fluorescence spectrometry (Figure  
166 3-figure supplement 1).

167 Recent studies reported that calmodulin binds to mammalian N-BAR proteins including  
168 endophilin A1 and A2 (Myers et al., 2016). Indeed, GST-pull down assay showed that  
169 endophilin A1 binds to calmodulin via its N-terminal BAR domain and the interaction is  
170 strengthened by Ca<sup>2+</sup> (Figure 3A-3F). We reasoned that Ca<sup>2+</sup>/calmodulin might function as  
171 upstream regulator of endophilin A1 function(s). As expected, co-immunoprecipitation (co-IP)  
172 from both transiently transfected HEK293 cells and mouse hippocampal neurons showed that  
173 the interaction between endophilin A1 and p140Cap is Ca<sup>2+</sup>-dependent (Figure 3G-3J).  
174 Moreover, co-IP from cultured hippocampal neurons revealed that LTP induction enhanced  
175 the interaction between endophilin A1 and p140Cap in a Ca<sup>2+</sup>- and NMDAR-dependent  
176 manner (Figure 3K and 3L). Further, the association of endophilin A1 with not only

177 calmodulin but also p140Cap was enhanced acutely upon LTP induction, which was abolished  
178 with the calmodulin inhibitor W-7 (Figure 3M and 3N), indicating that  $Ca^{2+}$ /calmodulin  
179 enhances endophilin A1–p140Cap interaction during the initial phase of LTP.

180 As regulator of actin remodeling, p140Cap recruits cortactin to drive Arp2/3-mediated  
181 branched actin polymerization (Jaworski et al., 2009; Schnoor et al., 2018; Yang et al., 2015).  
182 Indeed, co-IP of not only p140Cap but also cortactin by antibodies against endophilin A1 was  
183 enhanced by  $Ca^{2+}$  (Figure 3I and 3J). To test the idea that endophilin A1 functions via  
184 p140Cap and cortactin during the initial phase of sLTP, first we determined whether they are  
185 recruited to dendritic spines in an LTP- and endophilin A1-dependent manner. Quantitative  
186 analysis of immunofluorescence confocal images indicated that enrichment of p140Cap and  
187 cortactin in spines upon LTP induction requires not only endophilin A1 but also activities of  
188 calmodulin and NMDAR (Figure 3O-3R).

189 Next, to determine whether  $Ca^{2+}$ /calmodulin promotes actin polymerization via the  
190 endophilin A1–p140Cap pathway, we generated a calmodulin-binding deficient mutant of  
191 endophilin A1 (I154A/L158A, DM) that has much lower affinity for calmodulin than the WT  
192 protein (Figure 4A and 4B; and Figure 4-figure supplement 1), and tested whether it can  
193 rescue the sLTP phenotype of *EEN1* KO neurons. Indeed, WT but not the DM mutant of  
194 endophilin A1 restored the rapid increase in spine size and F-actin content in spines upon LTP  
195 induction (Figure 4C-4F). Moreover, Y343A, the p140Cap-binding deficient mutant of  
196 endophilin A1 (Yang et al., 2015), also failed to rescue the sLTP phenotype of *EEN1* KO  
197 neurons (Figure 4G-4I). Together, these data indicate that  $Ca^{2+}$ /calmodulin enhances the

198 recruitment of p140Cap by endophilin A1 to promote actin polymerization during the initial  
199 phase of sLTP.

200

201 **Ca<sup>2+</sup>/calmodulin-Dependent Increase in Plasma Membrane-Associated Endophilin A1**  
202 **Nanodomains Correlates with Spine Size During the Initial Phase of sLTP**

203 Single protein tracking and super-resolution imaging revealed dynamic changes in the  
204 nanoscale organization of branched F-actin regulators in spines during synaptic plasticity  
205 (Chazeau et al., 2014). Intriguingly, although the interaction between endophilin A1 and  
206 p140Cap is required for sLTP, overexpression of p140Cap could not rescue plasticity  
207 phenotypes of *EEN1* KO neurons (Yang et al., 2018), suggesting the existence of  
208 spatiotemporal regulation of their interaction during LTP induction. To this end, we analyzed  
209 the sub-spine localization of endophilin A1 by immunofluorescence staining and  
210 3D-structured illumination microscopy (3D-SIM). Interestingly, in spines endophilin A1 was  
211 organized into nanoscale objects (mean area 0.014  $\mu\text{m}^2$ , referred to as nanodomains) which  
212 did not overlap with PSD95, marker for the postsynaptic density (PSD) structure (Figure  
213 5-figure supplement 1A). Quantitative analysis revealed an NMDAR-dependent increase in  
214 the number of endophilin A1 nanodomains in spines undergoing sLTP (Figure 5-figure  
215 supplement 1A-1C). Moreover, the size of spine head correlated with the number but not the  
216 area of endophilin A1 nanodomains (F Figure 5-figure supplement 1E and 1F). In contrast, the  
217 number of endophilin A1 nanodomains did not correlate with the size of the PSD95-labeled  
218 PSD structures (Figure 5-figure supplement 1D and 1G). Further, treatment of hippocampal  
219 neurons with inhibitor of calmodulin but not CaMKII abolished the increase in not only spine

220 size but also the number of endophilin A1 puncta in spines (Figure 5-figure supplement  
221 1H-1J). These data together suggest that the calmodulin-regulated subsynaptic localization of  
222 endophilin A1 is required for spine enlargement.

223 As endophilin A1 contains the positive membrane curvature-sensing and binding N-BAR  
224 domain (Gallop et al., 2006) that enables it associate with invaginated plasma membrane, next  
225 we investigated whether its association with the spine plasma membrane is also regulated in  
226 the initial phase of sLTP. To distinguish plasma membrane-localized endophilin A1 from  
227 those localized to intracellular structures, we permeabilized cell membrane with the mild  
228 detergent saponin to limit access of antibodies to the cytosolic leaflet of the plasma membrane.  
229 Indeed, most endophilin A1 nanodomains were plasma membrane-localized (Figure 5A).  
230 Moreover, there was an increase in the number of plasma membrane-localized endophilin A1  
231 nanodomains as early as 1 minute after LTP induction (Figure 5B). Further, the number but  
232 not the area of the nanodomains correlated with the size of spine head (Figure 5B-5D). As  
233 endophilin A1 functions via p140Cap and its downstream effector cortactin (Yang et al., 2015)  
234 to activate Arp2/3 which in turn induces branched actin polymerization (Urano et al., 2001;  
235 Weaver et al., 2001), these data suggest that upon LTP induction, endophilin A1 localizes to  
236 the periphery of spine head and promotes local actin polymerization underneath the plasma  
237 membrane.

238 Given that sub-spine accumulation of endophilin A1 requires activation of NMDAR and  
239 calmodulin (Figure 5-figure supplement 1), we reasoned that upon NMDAR-mediated  $\text{Ca}^{2+}$   
240 influx, binding of  $\text{Ca}^{2+}$ -activated calmodulin to endophilin A1 not only enhances its  
241 interaction with p140Cap, but also facilitates its association with the invaginated plasma

242 membrane. Indeed, inhibition of NMDAR or calmodulin, not CaMKII, abolished  
243 glycine-induced increase in the number of plasma membrane-localized endophilin A1  
244 nanodomains (Figure 5A, 5C and 5E). Notably, although latrunculin A treatment inhibited  
245 spine enlargement, it had no effect on LTP-induced increase in plasma membrane-localized  
246 endophilin A1 (Figure 5F-5I), indicating that  $\text{Ca}^{2+}$ /calmodulin-enhanced association of  
247 endophilin A1 with the plasma membrane precedes actin polymerization during sLTP  
248 initiation.

249 To corroborate that  $\text{Ca}^{2+}$ /calmodulin regulates the association of endophilin A1 with the  
250 plasma membrane, we performed *in vitro* liposome sedimentation assays and found that,  
251 whilst calmodulin alone did not change the membrane-binding capacity of WT endophilin A1,  
252  $\text{Ca}^{2+}$ /calmodulin enhanced it significantly (Figure 5J and 5K). In contrast,  $\text{Ca}^{2+}$ /calmodulin  
253 had no effect on the membrane association ability of the calmodulin-binding deficient DM  
254 mutant of endophilin A1 (Figure 5J and 5K). Collectively, these data indicate that  
255  $\text{Ca}^{2+}$ /calmodulin enhances association of endophilin A1 with the plasma membrane of  
256 dendritic spines in the initial phase of sLTP.

257

## 258 **Endophilin A1 Promotes Branched Actin Polymerization Underneath the Plasma** 259 **Membrane**

260 Based on the findings that endophilin A1 accumulates into spine plasma membrane-associated  
261 nanodomains and recruits p140Cap and cortactin in the initial phase of sLTP, we further  
262 reasoned that it might transduce the  $\text{Ca}^{2+}$  signals instantaneously to enable plasma membrane  
263 expansion of spines by promoting branched actin polymerization. If it is true, we should be

264 able to detect more endophilin A1 associated with both membranes and the actin cytoskeleton  
265 upon LTP induction. To test this possibility, first we analyzed subcellular fractions of mouse  
266 hippocampi from animals subjected to fear conditioning, a physiological learning paradigm  
267 associated with synaptic plasticity. Indeed, compared with naïve mice, we detected significant  
268 increase in the amount of endophilin A1 and p140Cap in both membrane and cytoskeletal  
269 fractions from trained animals (Figure 6A and 6B). Consistently, although the levels of either  
270 protein remained unchanged (Figure 6C and 6D), their association with membrane and  
271 cytoskeleton fractions also increased in dissociated cultured hippocampal neurons in the  
272 initial phase of cLTP (Figure 6E and 6F). Moreover, the enhanced association of endophilin  
273 A1 and p140Cap with both membrane and cytoskeleton was inhibited by W-7 but not KN-62  
274 (Figure 6E and 6F), indicating that calmodulin is the immediate upstream regulator of their  
275 subcellular redistribution. Notably, subcellular distribution of endophilin A2, another member  
276 of the endophilin A family, was not affected by either neural activity or  $Ca^{2+}$ /calmodulin  
277 (Figure 6A-6F).

278 We then determined whether the membrane-binding capacity of endophilin A1 is  
279 required for the rapid spine enlargement of neurons undergoing sLTP. Compared with WT, the  
280 membrane-binding deficient mutant of endophilin A1 (KKK-EEE) (Gallop et al., 2006) was  
281 unable to rescue the deficit in acute spine enlargement of glycine-treated *EEN1* KO neurons  
282 (Figure 6G-6I). All together, these data indicate that rapid enlargement of spines in the initial  
283 phase of sLTP requires  $Ca^{2+}$ /calmodulin-dependent enhancement of not only endophilin  
284 A1-p140Cap interaction but also the association of endophilin A1 with membrane.

285 Since the small size of dendritic spines and the wide distribution of F-actin and actin



286 polymerization regulators in spines prevent us to better visualize the spatiotemporal  
287 relationship between plasma membrane association of endophilin A1 and its effectors, we  
288 tested whether there are changes in the subcellular distribution of endophilin A1 and Arp2/3 in  
289 response to  $\text{Ca}^{2+}$ /calmodulin using HeLa cell as a heterologous model system. In HeLa cells  
290 ectopically co-expressing endophilin A1 and p140Cap, upon  $\text{Ca}^{2+}$  influx induced by the  
291 calcium ionophore ionomycin, we detected enrichment of endophilin A1 signals underneath  
292 the plasma membrane by confocal microscopy (Figure 6-figure supplement 1A). Moreover,  
293 preincubation with W-7 but not latrunculin or CK-666 abolished ionomycin-induced  
294 endophilin A1 recruitment to the cell periphery (Figure 6-figure supplement 1A), indicating  
295 that  $\text{Ca}^{2+}$ -activated calmodulin directly regulates accumulation of endophilin A1 at the plasma  
296 membrane. Further, although the strong intrinsic signals for cortical actin did not allow us to  
297 quantify changes in F-actin content underneath the plasma membrane, the Arp2/3 complex  
298 (labeled with fluorescently tagged Arp1b) was also enriched in the cell periphery upon  
299 ionomycin application (Figure 6-figure supplement 1B). In contrast, ionomycin treatment  
300 failed to cause recruitment of either the membrane-binding (KKK-EEE) or the  
301 calmodulin-binding deficient mutant of endophilin A1 to the cell periphery (Figure 6-figure  
302 supplement 1B). Intriguingly, although ionomycin treatment increased plasma membrane  
303 association of the p140Cap-binding mutant Y343A, no enrichment of Arp1b signals at the cell  
304 periphery was observed (Figure 6-figure supplement 1B), indicating that recruitment of the  
305 Arp2/3 complex underneath the plasma membrane requires the interaction between  
306 endophilin A1 and p140Cap. Collectively, these results support that  $\text{Ca}^{2+}$ /calmodulin enhances  
307 association of endophilin A1 with the plasma membrane and promotes branched actin

308 polymerization in spines.

309

310 **Ca<sup>2+</sup>/calmodulin-Regulated Functions of Endophilin A1 is Required for LTP and**

311 **Long-term Memory**

312 It was proposed that spine enlargement enables formation of a stable F-actin:cofilin complex

313 that serves as a synaptic tag to capture postsynaptic constituent proteins for maintenance and

314 consolidation of the potentiated state (Bosch et al., 2014). To determine the functional

315 significance of endophilin A1-mediated structural plasticity, next we tested whether the

316 molecular functions of endophilin A1 in structural plasticity are also required for LTP by

317 electrophysiological analyses. To this end, we performed molecular replacement in a small

318 subset of neurons by injection of the hippocampal CA1 region of *EENI*<sup>fl/fl</sup> mice with

319 adeno-associated viral vectors encoding the Cre recombinase (AAV-mCherry-Cre) together

320 with those encoding either WT or mutant endophilin A1 (AAV-EGFP-2A-EEN1 WT, Y343A,

321 KKK-EEE or DM) at postnatal day 0 (P0), and induced LTP in Schaffer-collateral synapses

322 by double patch whole-cell recording of non-infected (control, *EENI*<sup>fl/fl</sup>) and virus-infected

323 CA1 pyramidal cells in acute slices from virus-injected animals at P14-21. In line with our

324 previous findings (Yang et al., 2018), Cre-mediated knockout of *EENI* caused significant

325 impairment of LTP, which was fully rescued by re-expression of WT endophilin A1 (Figure

326 7A, 7B and 7F). In contrast, none of the mutants could rescue the magnitude or the

327 maintenance of LTP in *EENI*<sup>-/-</sup> neurons (Figure 7C-7F), indicating that indeed, molecular

328 functions of endophilin A1 to initiate sLTP is required for expression and stabilization of

329 synaptic potentiation.

330 Finally, we determined the physiological significance of the mechanistic roles of  
331 endophilin A1 in LTP by testing whether endophilin A1 mutants can rescue the learning and  
332 memory deficits in *EEN1* KO mice. Indeed, whilst AAV-mediated expression of WT  
333 endophilin A1 in the CA1 region restored the long-term memory in KO mice in both Morris  
334 water maze and fear conditioning tests, neither of the three mutants ameliorated the  
335 phenotypes (Figure 7G-O). Collectively these data indicate that in CA1 pyramidal cells, not  
336 only the p140Cap-binding, but also the calmodulin-interaction and membrane association  
337 capacities of endophilin A1 are required for long-term synaptic potentiation and memory.

338

### 339 **Discussion**

340 The temporal phases of sLTP include initiation of spine expansion ( $\leq 1$  min after LTP  
341 stimulation, initial phase), transient (early phase) and sustained spine enlargement (late phase)  
342 (Harvey and Svoboda, 2007; Matsuzaki et al., 2004). Although actin polymerization is  
343 essential for sLTP (Matsuzaki et al., 2004; Obashi et al., 2019), little is known about the  
344 relationship between actin remodeling and membrane dynamics during the initial phase due to  
345 limited spatiotemporal resolution of light microscopy. Moreover, although imaging studies  
346 have revealed subspine organization and dynamics of F-actin pools as well as nanoscale  
347 segregation of branched F-actin regulators in dendritic spines and suggested that their  
348 localization might be spatially and temporally controlled during activity-dependent  
349 morphological changes (Chazeau et al., 2014; Honkura et al., 2008), the precise sequence of  
350 molecular events leading to rapid structural expansion of spines remains to be defined. In this  
351 work, we uncover a novel mechanism for initiation of sLTP. We show that in direct response

352 to  $\text{Ca}^{2+}$ /calmodulin, endophilin A1 drives acute spine enlargement in NMDAR-mediated sLTP  
353 by localizing to spine plasma membrane and recruiting p140Cap to promote branched actin  
354 polymerization (Figure 8).

355 Endophilin A2 and A3, two other members of the endophilin A family, have been found  
356 to interact with the immediate early protein Arc/Arg3.1 to accelerate AMPAR endocytosis and  
357 might contribute to late-phase synaptic plasticity (Chowdhury et al., 2006). The impairment of  
358 structural and functional plasticity of potentiated dendritic spines caused by ablation of  
359 endophilin A1 cannot be rescued by overexpression of endophilin A2 or A3 (Yang et al.,  
360 2018). Although both endophilin A1 and A2 interact with calmodulin (Myers et al., 2016)  
361 (and Figure 3, this study), only endophilin A1, but not A2 or A3, binds to and recruits  
362 p140Cap to dendritic spines to promote actin polymerization (Yang et al., 2015). Moreover, *in*  
363 *vivo* and *in vitro* LTP stimuli induce increased association of endophilin A1, but not  
364 endophilin A2, with both membrane and cytoskeleton (Figure 6, this study). Together these  
365 findings indicate that different interaction partners for the endophilin A family members  
366 confer them distinct mechanistic roles in the induction and expression of synaptic plasticity in  
367 dendritic spines.

368 Consistent with previous reports (Yang et al., 2008), we found that SNARE-mediated  
369 membrane fusion is not required for rapid spine expansion in the initial phase of sLTP (Figure  
370 2). Upon LTP induction,  $\text{Ca}^{2+}$  influx through the NMDAR ion channel activates calmodulin,  
371 which in turn activates CaMKII and its downstream signaling cascades to trigger various  
372 subcellular events including actin remodeling (Chazeau et al., 2014). Previous live imaging  
373 studies have revealed calmodulin-dependent formation of an F-actin pool that associates with

374 spine enlargement (hence referred to as “enlargement pool”) (Honkura et al., 2008). Although  
375 the observation that the membrane ruffling of the spine head synchronizes with the  
376 enlargement pool of F-actin has prompted the authors to conclude that spine enlargement is  
377 induced by the propulsive force generated by calmodulin-regulated actin polymerization  
378 (Honkura et al., 2008), the mechanistic link between  $\text{Ca}^{2+}$ /calmodulin and actin  
379 polymerization was still missing. In this study, we demonstrate that membrane-associated  
380 endophilin A1 is the direct molecular target of  $\text{Ca}^{2+}$ /calmodulin, which enhances both its  
381 membrane association and its interaction with the downstream effector p140Cap (Figure 3  
382 and 5). Our data further indicate that coordination of the membrane-association and  
383 p140Cap-binding capacities of endophilin A1 provides the protrusive force for rapid structural  
384 remodeling of dendritic spines by promoting actin polymerization underneath the plasma  
385 membrane (Figure 4, 6, 7 and 8), which is also in good agreement with most recent studies  
386 that the interplay between membrane tension and branched actin polymerization could  
387 produce membrane deformations (Simon et al., 2019).

388 Most recent studies revealed that although Rac1 activity is not required for the initial  
389 spine expansion induced by glutamate uncaging, formation of a “reciprocally activating  
390 kinase-effector complex” (RAKEC) between CaMKII, and Tiam1, a guanine exchange factor  
391 for Rac (RacGEF), converts the transient  $\text{Ca}^{2+}$  signal triggered by LTP induction into a  
392 persistent kinase signal required for the maintenance of sLTP (Saneyoshi et al., 2019). Given  
393 the spinous dynamic reorganization of nanoscale distribution of various F-actin regulators that  
394 are downstream of  $\text{Ca}^{2+}$ /calmodulin and CaMKII (Chazeau and Giannone, 2016; Chazeau et  
395 al., 2014), including the F-actin severing protein cofilin (Noguchi et al., 2016), there might be

396 crosstalk between  $\text{Ca}^{2+}$ /calmodulin-dependent, endophilin A1-mediated actin polymerization  
397 and other  $\text{Ca}^{2+}$ /calmodulin and/or CaMKII effector-regulated pathways (e.g., Rac1 and  
398 ADF/cofilin), which enables spatiotemporally controlled actin reorganization during the  
399 initial phase and/or the transition to the early phase of sLTP.

400 Colpene-6, a  $\text{Ca}^{2+}$  sensor, relocalizes from the cytosol of dendrites to lipid raft-enriched  
401 postsynaptic plasma membrane in response to NMDAR-mediated  $\text{Ca}^{2+}$  influx, and activates  
402 Rac1 to spines during synaptic potentiation (Reinhard et al., 2016). It is also required for  
403 spine structural plasticity and LTP, probably contributing to stabilization of the actin  
404 cytoskeleton by inhibiting ADF/cofilin via the Rac1-PAK-LIMK1 pathway (Reinhard et al.,  
405 2016). In addition, by keeping cortactin active to prevent branched actin filaments from  
406 severing by ADF/cofilin, the fast  $\text{Ca}^{2+}$  sensor caldendrin stabilizes an F-actin pool at the spine  
407 base required for the structural remodeling of spines in the transition from early to late phase  
408 LTP (Mikhaylova et al., 2018). In our study, while repetitive expansion and shrinkage of spine  
409 heads were also observed in *EENI* KO neurons, the F-actin content and spine size remained  
410 constant during the initial phase of sLTP (Figure 1). Rather than stabilizing F-actin,  
411 endophilin A1 responds to  $\text{Ca}^{2+}$ /calmodulin and promotes branched actin polymerization  
412 beneath the plasma membrane to achieve rapid spine enlargement. While they all function via  
413 CaMKII-independent mechanisms to regulate actin dynamics, how Colpene-6, caldendrin and  
414 endophilin A1 coordinate with each other to ensure spine potentiation and stabilization awaits  
415 further investigation.

416

417

418 **Acknowledgements**

419 We thank Dr. Anbing Shi (Huazhong University of Science and Technology) for critical  
420 comments on the manuscript. This work was supported by funding from the National Natural  
421 Science Foundation of China (31530039 and 91954126 to J-J. Liu, 31571056 to Y. Yang,  
422 91849112 to Y. S. Shi and 81901161 to J. Chen, 91754202 to Dong Li and 31670846 to C.  
423 Ma), Ministry of Science and Technology of China (2016YFA0500100 to J-J. Liu and  
424 2019YFA0801603 to Y.S. Shi), and the Strategic Priority Research Program of Chinese  
425 Academy of Science (XDB32020100).

426

427 **Author Contributions**

428 Conceptualization, Y.Y. and J-J.L.; Investigation, Y.Y., J.C., X.C., Di.L., S.Z., X.Y., S.D.,  
429 D.W., Z.G., and S.Z.; Formal analysis, Y.Y., J.C., X.C., J.H., S.Z., and S.D.; Visualization,  
430 Y.Y., J.C., X.C., J.H., S.Z., S.D., X.L. and S.D.; Writing – Original Draft, Y.Y., J.C., S.Z., X.Y.,  
431 X.L., Y.S.S., and J-J.L.; Funding Acquisition, Y.Y., J.C., Dong L., C.M., Y.S.S. and J-J.L.;  
432 Supervision, Dong.L., C.M., X.L., Y.S.S., and J-J.L.; Project Administration, J-J.L.

433

434 **Declaration of Interests**

435 The authors declare no competing interests.

436

437 **Materials and Methods**

438 **Ethics statement**

439 All animal experiments were approved by and performed in accordance with the guidelines of

440 the Animal Care and Use Committee of Institute of Genetics and Developmental Biology,  
441 Chinese Academy of Sciences (Approval code: AP2013003 and AP2015002), and the Animal  
442 Care and Use Committee of the Model Animal Research Center, the Host for the National  
443 Resource Center for Mutant Mice in China, Nanjing University (Approval code: AP#SY06).  
444 All animals were housed in standard mouse cages at 22-24 °C on a 12 h light/dark cycle with  
445 access to food and water freely.

446

#### 447 **Animals**

448 Generation of *EEN1*<sup>fl/fl</sup> and *EEN1*<sup>-/-</sup> mice on the C57BL/6J background was as previously  
449 described (Yang et al., 2018). Briefly, the targeting vector for *EEN1* was obtained from  
450 European Mouse Mutant Cell Repository (EuMMCR, PRPGS00060\_A\_A02). The endophilin  
451 A1 KO first and *EEN1*<sup>fl/fl</sup> C57BL/6J mice were generated at Nanjing Model Animal Research  
452 Center of Nanjing University. Genotyping of mouse lines was performed by genomic PCR of  
453 tail prep DNA from offspring with the following primer pairs: loxPF/loxPR:  
454 5'-CAAGGACTCCCAGAGACCTAGCATC-3' and  
455 5'-GAGATGGCGCAACGCAATTAAT-3' (A PCR product of 375 base pairs in *EEN1* KO  
456 first mice but none in wild-type mice).

457 zptF/zptR: 5'-GTAAGCGGCTCTAGCGCATGTTCT-3' and  
458 5'-GCAGGGGCATGTAGGTGGCTCAAC-3' (A PCR product of 466 base pairs in WT mice,  
459 none in *EEN1* KO first mice, and of 627 base pairs in *EEN1*<sup>fl/fl</sup> mice).

460

#### 461 **Constructs**



462 The putative amino acid residues of EEN1 involved in calmodulin binding were predicated  
463 using the Binding Site Search and Analysis tool provided at the Calmodulin Target Database:  
464 <http://calcium.uhnres.utoronto.ca/ctdb/ctdb/home.html>. pCMV-Tag2B-EEN1 DM and  
465 pET28a(+)-EEN1 single mutants and DM (mutation I154 and L158 to A) were created by  
466 site-directed mutagenesis using pCMV-Tag2B-EEN1 and pET28a(+)-EEN1 as template,  
467 respectively. pET28a(+)-EEN1  $\Delta$ BAR ( $\Delta$  aa 6-242) and pET28a(+)-EEN1  $\Delta$ SH3 ( $\Delta$  aa  
468 295-346) were subcloned from pGEX4T-1-EEN1  $\Delta$ BAR and pGEX4T-1-EEN1  $\Delta$ SH3. The  
469 pAAV-CaMKII $\alpha$ -EGFP-2A-MCS-3FLAG-EEN1 or mutant of EEN1 AAV viral constructs  
470 (KKK-EEE, Y343A and DM) were generated by cloning EEN1 cDNA amplified from  
471 pCMV-Tag2B-EEN1 or mutant constructs into the pAAV-CaMKII $\alpha$ -EGFP-2A-MCS-3FLAG.  
472 The bacterial expression construct for His-tagged p140Cap fragment (aa 351-1051) was  
473 generated by PCR amplification of the cDNA encoding p140Cap (aa 351-1051) and insertion  
474 into pET-28a(+). Bacterial expression constructs for calmodulin were generated by PCR  
475 amplification of cDNA for mouse calmodulin from mouse brain by RT-PCR and insertion into  
476 pGEX4T-1 and pET28a(+). Arp1b-mCherry construct was a generous gift from Drs. Na Mi  
477 and Li Yu (Tsinghua University, China). All other constructs used in this study  
478 (pCMV-Tag2B-EEN1 WT, pCMV-Tag2B-EEN1 Y343A, pCMV-Tag2B-EEN1 KKK-EEE,  
479 mGFP and LifeAct-mCherry) were described previously (Guo et al., 2018; Yang et al., 2018).  
480 Viral particles of adeno-associated virus (AAV) carrying pAOV-CaMKII $\alpha$ -EGFP-2A-Cre,  
481 pAAV-CaMKII $\alpha$ -EGFP-2A-MCS-3FLAG-EEN1 or mutants of EEN1 and the control  
482 construct pAAV-CaMKII $\alpha$ -EGFP-2A-MCS-3FLAG were purchased from OBiO Technology  
483 (Shanghai) Corp. Ltd., (Shanghai, China).

484

485 **Antibodies**

486 The following antibodies were obtained from commercial sources: goat anti-endophilin A1  
487 (S-20), endophilin A2 (E-15), mouse anti-SYP (D-4), and mouse anti-cortactin (E-4) (Santa  
488 Cruz Biotechnology, Santa Cruz, CA, USA) for WB and anti-cortactin (EMD Millipore,  
489 Temecula, CA, USA) for staining; rabbit anti-endophilin A1 (Synaptic Systems GmbH,  
490 Germany); rabbit anti-Myc, mouse anti-GST, rabbit and mouse anti-GFP, rabbit and mouse  
491 anti-RFP which recognizes DsRed and mCherry (Medical & Biological Laboratories,  
492 Naka-ku Nagoya, Japan); mouse anti-M5 DYKDDDDK-Tag (Mei5 Biotechnology, Beijing,  
493 China), mouse anti- $\alpha$ -tubulin and mouse anti- $\beta$ -actin (Sigma-Aldrich, St. Louis, MO, USA);  
494 mouse anti-His (CoWin Biosciences, Jiangsu, China), rabbit anti-calmodulin (Boster  
495 Biological Technology, Pleasanton, CA, USA) for WB and mouse anti-calmodulin (Invitrogen,  
496 Carlsbad, CA, USA) for IP; Rabbit anti-p140Cap was described previously (Yang et al., 2015).  
497 Secondary antibodies for immunofluorescence staining were from Molecular Probes  
498 (Invitrogen, Carlsbad, CA, USA).

499

500 **Cell culture, transfection and drug treatment**

501 Primary hippocampal neurons were cultured as previously described (Yang et al., 2018).  
502 Briefly, mouse hippocampi were dissected from P0 C57BL/6J mice, dissociated with 0.125%  
503 trypsin in Hank's balanced salt solution without  $\text{Ca}^{2+}$  and  $\text{Mg}^{2+}$  at 37°C for 15 min, triturated  
504 in DMEM, 10% F12, and 10% FBS (Gibco, Carlsbad, CA, USA). Hippocampal neurons were  
505 plated on poly-D-lysine-coated coverslips in 24-well plates or 30-mm dishes at a density of

506  $2.5-3.0 \times 10^4$  cells/well in 24-well plate or  $1.0-1.2 \times 10^5$  cells/35 mm dish. The medium was  
507 replaced with the serum-free Neurobasal A (NB-A) media supplemented with 2% B27  
508 supplement, GlutaMAX (Gibco, Carlsbad, CA, USA) and 0.3% glucose 4 h after plating. Half  
509 of the media were replaced every 3 days until use.

510 For neuronal morphology and immunofluorescence staining, neuronal transfections were  
511 performed using Lipofectamine LTX according to the manufacturer's instructions (Invitrogen,  
512 Carlsbad, CA, USA) on 12-14 days *in vitro* (DIV) after plating. Briefly, DNA (0.5  $\mu\text{g}/\text{well}$ )  
513 was mixed with 0.5  $\mu\text{l}$  PLUS reagent in 50  $\mu\text{l}$  Neurobasal A medium, then mixed with 1.0  $\mu\text{l}$   
514 Lipofectamine LTX in 50  $\mu\text{l}$  NB-A medium, incubated for 20 min and then added to the  
515 neurons in NB-A at 37 °C in 5% CO<sub>2</sub> for 1 h. Neurons were then rinsed with NB-A and  
516 incubated in the original medium at 37 °C in 5% CO<sub>2</sub> for 4-5 days. For co-transfection,  
517 neurons were transfected with 1.0  $\mu\text{g}$  of DNA consisting of two plasmids (0.50  $\mu\text{g}$  each).

518 For HeLa cell culture or HEK293T cell culture, DMEM supplemented with 10% FBS  
519 were used. Cell transfections were performed using Lipofectamine2000 according to the  
520 manufacturer's instructions (Invitrogen) after plating.

521 For inhibitor treatment, HeLa cells or primary neurons cultured on coverslips were  
522 pre-incubated with MK801 (10  $\mu\text{M}$ , Sigma-Aldrich), Latrunculin A (100 nM, Sigma-Aldrich),  
523 NSC 23766 trihydrochloride (100  $\mu\text{M}$ , Abcam), CK-666 (100  $\mu\text{M}$ , Sigma-Aldrich), W-7 (20  
524  $\mu\text{M}$ , TOCRIS), KN-62 (4  $\mu\text{M}$ , TOCRIS), BAPTA-AM (10  $\mu\text{M}$ , Sigma-Aldrich) for 30 min.  
525 Neurons were pre-incubated with ML141 (15  $\mu\text{M}$ , Sigma-Aldrich) or SMIFH2 (30  $\mu\text{M}$ ,  
526 Millipore) for 2 h or with CT04 (2  $\mu\text{g}/\text{ml}$ , Cytoskeleton) for 3 h. For tetanus toxin treatment  
527 (10 nM, Sigma-Aldrich), neurons were pre-incubated for 10 min. These drugs were

528 maintained during glycine or ionomycin application.

529 For ionomycin treatment of HeLa cells, cells were pre-incubated with modified  
530 Krebs-Ringer Hepes buffer (containing 120 mM NaCl, 4.8 mM KCl, 1.2 mM KH<sub>2</sub>PO<sub>4</sub>, 1.2  
531 mM MgSO<sub>4</sub>, 1.3 mM CaCl<sub>2</sub>, 5.5 mM glucose, 25 mM HEPES, pH 7.4, at 37 °C) for 30 min  
532 then treated with ionomycin (2 μM, Beyotime Biotechnology) in KRH buffer for 20 min.

533

#### 534 **Chemically-induced LTP (cLTP)**

535 Chemical induction of LTP was performed as previously described (Fortin et al., 2010; Park  
536 et al., 2006). Briefly, neurons were treated with glycine (200 μM) in Mg<sup>2+</sup>-free extracellular  
537 iso-osmotic solution (mM: 125 NaCl, 2.5 KCl, 2 CaCl<sub>2</sub>, 5 HEPES, 33 glucose, 0.2 glycine,  
538 0.02 bicuculline, and 0.003 strychnine, pH 7.4) (Yang et al., 2018). For experiments  
539 performed in the absence of extracellular Ca<sup>2+</sup>, 10 μM BAPTA-AM was substituted for 2 mM  
540 CaCl<sub>2</sub> in the Mg<sup>2+</sup>-free extracellular solution.

541 For experiment to determine the role of membrane tension in spine expansion, neurons  
542 were pretreated with the hypo-osmotic solution (mM: 80 NaCl, 2.5 KCl, 2 CaCl<sub>2</sub>, 5 HEPES,  
543 33 glucose, pH 7.4, OSM 210) or hyper-osmotic solution (mM: 125 NaCl, 2.5 KCl, 2 CaCl<sub>2</sub>,  
544 5 HEPES, 33 glucose, 250 mM sucrose, pH 7.4, OSM 600) for 20 min and chemically  
545 induced LTP in the same solution.

546

#### 547 **Immunostaining, image acquisition and analysis**

548 Neurons were fixed in 4% PFA/4% sucrose in PBS at RT for 15 min. After blocking with 1%  
549 BSA in PBS containing 0.4% Triton X-100 for 40 min at RT, neurons were incubated with

550 primary antibodies for 1 h at RT or overnight at 4°C, and appropriate secondary antibodies  
551 conjugated with Alexa Fluor 488, Alexa Fluor 555, or Alexa Fluor 647 were applied for  
552 detection.

553 Confocal images were collected using the Spectral Imaging Confocal Microscope Digital  
554 Eclipse C1Si (Nikon, Tokyo, Japan) with a 100× Plan Apochromat VC (NA 1.40) oil  
555 objective. Images were z projections of images taken at 0.2 μm step intervals. The number of  
556 planes, typically 4-6, was chosen to encompass the entire dendrite from top to bottom.

557 The procedure for morphometric analysis of dendritic spines was described previously  
558 (Yang et al., 2015) (Yang et al., 2018). DsRed was used as a cell-fill. The final reconstructed  
559 spines were obtained using a maximum-intensity projection strategy provided by  
560 NIS-Elements AR software (Nikon). DsRed-labeled spines were outlined manually. Dendritic  
561 segments 40-120 μm from the neuronal cell body were selected for analysis. All  
562 morphological experiments were repeated at least three times with an  $n \geq 11$  for individual  
563 experiments.

564

### 565 **Super-resolution live cell imaging and data analysis**

566 The GI-SIM live imaging experiments were performed as described by Guo et al (Guo et al.,  
567 2018). Briefly, mouse hippocampal neurons cultured on 25-mm coverslips were transfected  
568 with constructs expressing membrane-bound GFP (mGFP) and LifeAct-mCherry on DIV12  
569 and imaged on DIV16 in  $Mg^{2+}$ -free extracellular solution (Yang et al., 2018). Time-lapse  
570 images were obtained with acquisition time of 110 ms for each channel at 5 s intervals. To  
571 quantify the area of each spine head and enrichment of F-actin in spines, we measured the

572 fluorescence mean intensity of LifeAct-mCherry within the spines and normalized each  
573 measurement by the fluorescence signal along the adjacent dendritic shaft with the NIH  
574 ImageJ software. The mGFP-labeled dendrites or spines were outlined manually.

575 For analysis of the spatiotemporal relationship between actin polymerization and  
576 membrane expansion in dendritic spines, spines were segmented from raw GI-SIM images  
577 using Otsu's method (Otsu, 1979). The area of each spine and the mean fluorescence signal of  
578 F-actin inside each spine were then quantified using NIH ImageJ. To facilitate the  
579 visualization of instantaneous spine growth and localized actin polymerization, differential  
580 images of both membrane (mGFP) and actin (LifeAct-mCherry) channels were calculated by  
581 subtracting the image at time point  $t$  from that at  $t+1$  through the entire time lapse movie (1  
582 min duration before and 3 min duration post glycine application with 5 s intervals) using  
583 Matlab (R2018a, Mathworks). To highlight the regions with spine growth or increased F-actin  
584 signals, only pixels with a positive difference were displayed in the final differential images.  
585 We then measured the overlap between differential images in the membrane channel and  
586 those in the actin channel at individual time points, and determined the extent of overlap by  
587 calculating the ratio of overlapped to total changes in the membrane channel using the JACoP  
588 plug-in of the ImageJ software. Then we obtained fluctuations in the extent of overlap at  
589 different time points before or post glycine treatment to evaluate the randomness of overlap  
590 between membrane expansion and actin polymerization.

591

## 592 **Immunohistochemical analyses**

593 Mice were anesthetized with 1% sodium pentobarbital and transcardially perfused with

594 normal saline followed by 4% paraformaldehyde (PFA) in 0.01 M phosphate-buffered saline  
595 (PBS). Mouse brain was dissected out and post-fixed with 4% PFA/PBS for 4 h at 4 °C. Fixed  
596 brain was incubated with 20% sucrose overnight and then 30% sucrose overnight. The brain  
597 was embedded in OCT and stored at -80°C until usage. Thirty-micron cyrosections were  
598 made using cryostat and collected.

599 For immunostaining of brain sections, floating 30 µm-thick slices were rinsed with PBS  
600 and permeabilized in 0.4% Triton X-100 in 0.01M PBS for 30 min. Cyrosections were  
601 blocked with 1% BSA in PBS containing 0.4% Triton X-100 for 1 h at RT, then incubated  
602 with primary antibodies overnight at 4 °C. Secondary antibodies conjugated with Alexa Fluor  
603 555 were used for detection. Sections were then incubated with DAPI (Roche,  
604 Grenzach-Wyhlen, Germany) for nuclear staining for 5 min at RT. Following rinsing,  
605 cyrosections were mounted on gelatin-coated slides and covered with coverslip with  
606 mounting medium. Confocal images were collected using the Spectral Imaging Confocal  
607 Microscope Digital Eclipse C1Si (Nikon, Tokyo, Japan) with a 10×Plan Apochromat DIC N1  
608 0.45 objective or 40×Plan Fluo (NA 1.30) oil objective (Yang et al., 2018).

609

#### 610 **Protein expression and purification**

611 His-EEN1, His-calmodulin, His-p140Cap fragment (aa 351-1051) or GST-Calmodulin was  
612 expressed in *E. coli* BL21 (DE3). Cells were grown at 37 °C in LB (g/L: tryptone 10, yeast  
613 extract 5, NaCl 10) supplemented with ampicillin or kanamycin. Cells were induced at OD<sub>600</sub>  
614 of ~0.6 with 0.4 mM isopropyl β-D-1-thiogalactopyranoside (IPTG) for 4 h at 30 °C or 16 h  
615 at 16 °C. Cells were harvested and stored at -80 °C until purification.

616 For His-tagged proteins, cells were resuspended in lysis buffer (50 mM NaH<sub>2</sub>PO<sub>4</sub>, 300  
617 mM NaCl, 15 mM imidazole, pH 8.0) supplemented with 1% Triton X-100 and 0.1 mM  
618 PMSF. Protein were purified with Ni-NTA resin according to the manufacturer's instructions  
619 (R90115, Invitrogen). For GST-tagged proteins, cells were resuspended in PBS supplemented  
620 with 0.2% Triton X-100 and 0.1 mM PMSF. Protein were purified with Glutathione  
621 Sepharose 4B (GE17-0756-01, Sigma-Aldrich, St. Louis, MO, USA) according to the  
622 manufacturer's instructions.

623 For liposome sedimentation assay, purified His-calmodulin was dialyzed in a  
624 Spectra/Por™ 4 RC Dialysis Membrane Tubing (08-667D, Thermo Fisher Scientific,  
625 Waltham, MA, USA) against 1,000 volumes of PBS supplemented with 0.5 mM EGTA at  
626 4 °C for 4 h and replaced with fresh 1,000 volumes of PBS twice.

627

#### 628 **Isothermal titration calorimetry (ITC)**

629 ITC was performed on a MicroCal PEAQ-ITC ((Malvern Panalytical, U.S.A) calorimeter.  
630 Calmodulin and EEN1 were purified on a Superdex-200 16/600 column (GE Healthcare,  
631 U.S.A) in solution buffer containing 20 mM Tris-Cl at pH 7.0, 150 mM NaCl. Solution buffer  
632 containing 1 mM calcium was injected into the calorimeter cell fullfilled with  
633 protein solution, cell temperature set to 25°C. Each analysis involved 20 injections of 4 s  
634 duration (2 µL per one injection), 120 s spacing, stir with 750 rpm, 5 µcal/s reference power  
635 and high gain feedback mode. Data were processed by Origin software to obtain  
636 thermodynamic profiles.

637



638 **GST-pull down, co-immunoprecipitation (IP) and immunoisolation**

639 For GST-pull down assays, 5  $\mu$ g of GST-tagged protein conjugated with  
640 glutathione-Sepharose beads was incubated with 1  $\mu$ g of His-tagged protein in 0.01 M PBS  
641 supplemented with 1% NP-40 at 4°C for 1 h. Beads then was washed five times with PBS  
642 supplemented with 0.3% Triton-X 100 and was boiled in SDS sample buffer.

643 For co-IP experiments, HEK293T cells, cultured neurons or mouse brain were lysed with  
644 lysis buffer 1 (0.05% [vol/vol] NP-40, 15 mM Tris-HCl, pH 7.4, 50 mM NaCl) supplemented  
645 with protease inhibitors for IP of endogenous proteins (endo-IP), or with lysis buffer 2 (0.1%  
646 [vol/vol] NP-40, 50 mM Tris-HCl, pH 7.4, 150 mM NaCl) supplemented with protease  
647 inhibitors for Flag-IP. Lysates were then centrifuged at 16,000  $\times$  g for 15 min at 4°C. For Flag  
648 IP, cell lysates were incubated with anti-Flag Affinity Gel (Sigma-Aldrich) at 4°C for 4 h on a  
649 roller mixer. For endo-IP, antibody (1  $\mu$ g) was added to the cell lysates and incubated at 4°C  
650 for 2 h on a roller mixer, followed by incubation with Protein G agarose (Santa Cruz)  
651 pre-equilibrated in lysis buffer overnight at 4°C. Immunoprecipitates were washed four times  
652 in lysis buffer and boiled in SDS sample buffer, then subjected to SDS-PAGE s and  
653 immunoblotting.

654 For immunoisolation of membrane proteins, cultured neurons were homogenized with  
655 lysis buffer (mM: Tris-HCl 20, HEPES pH 7.4 10, NaCl 150, sucrose 250) supplemented with  
656 protease inhibitors and centrifuged at 800  $\times$  g for 15 min. The supernatants were collected and  
657 subjected to high-speed centrifugation at 100,000  $\times$  g for 1h (TLS-55 rotor, OptimaTMMAX  
658 Ultracentrifuge; Beckman Coulter, Germany). The supernatants (S100) and pellets (p100, the  
659 membrane fraction) resuspended in lysis buffer were subjected to immunoisolation with

660 Dynabeads Protein G (Invitrogen, Carlsbad, CA, USA) coupled with 2  $\mu$ g of mouse  
661 anti-calmodulin antibody. Bound proteins were eluted by boiling in 2 $\times$  SDS gel loading buffer  
662 and subjected to SDS-PAGE and immunoblotting.

663

#### 664 **Subcellular fractionation**

665 Cultured neurons or mouse hippocampi were homogenized to isolate the membrane and  
666 cytoskeleton fractions with Subcellular Protein Fractionation Kit for Cultured Cells (Thermo,  
667 77840) or for tissues (Thermo, 87790) according to the manufacturer's instructions. Proteins  
668 in different fractions were subjected to SDS-PAGE and immunoblotting.

669

#### 670 **Liposome co-sedimentation assay**

671 Brain extract from bovine brain (Sigma-Aldrich, B1502) were dissolved in chloroform and  
672 dried under vacuum for 30 min. The solvent-free lipid films were rehydrated with liposome  
673 buffer (150  $\mu$ M NaCl, 20  $\mu$ M Tris-HCl pH 7.4, 1 mM DTT) and subjected to 7 cycles of  
674 flash freezing in liquid nitrogen and thawing in a 37°C bath. Liposomes were then extruded  
675 21 times through a polycarbonate membrane with a 50  $\mu$ m pore size (Mini-Extruder, Avanti  
676 Polar Lipids). Extruded liposomes were centrifuged at 18,000 g for 5 min to remove insoluble  
677 material and stored at 4°C. Liposomes (0.5 mg/ml) were then incubated with freshly purified  
678 recombinant proteins (1  $\mu$ M His-EEN1 or 1  $\mu$ M His-EEN1 and 2  $\mu$ M His-calmodulin), in  
679 100  $\mu$ l liposome buffer for 10 min at 30°C before sedimentation at 140,000g for 30 min at  
680 4°C. The supernatant (unbound) and pellet (bound) were subjected to SDS-PAGE. Ratios of  
681 binding to liposomes were determined using NIH ImageJ software.

682

683 **Three-dimensional Structured Illumination Microscopy (3D-SIM) imaging and image**  
684 **analysis**

685 3D-SIM images were acquired as previously described (Niu et al., 2013) on the DeltaVision  
686 OMX V4 imaging system (Applied Precision Inc, USA) with a 100 × 1.4 oil objective  
687 (Olympus UPlanSApo), solid state multimode lasers (488, 593 and 642 nm) and  
688 electron-multiplying CCD (charge-coupled device) cameras (Evolve 512×512, Photometrics,  
689 USA). Serial Z-stack sectioning was done at 125 nm intervals. The microscope is routinely  
690 calibrated with 100 nm fluorescent spheres to calculate both the lateral and axial limits of  
691 image resolution. SIM image stacks were reconstructed using softWoRx 5.0 (Applied  
692 Precision) with the following settings: pixel size 39.5 nm; channel-specific optical transfer  
693 functions; Wiener filter 0.001000; discard Negative Intensities background; drift correction  
694 with respect to first angle; custom K0 guess angles for camera positions. Pixel registration  
695 was corrected to be less than 1 pixel for all channels using 100 nm Tetraspeck beads. For  
696 clarity of display, small linear changes to brightness and contrast were performed on  
697 three-dimensional reconstructions.

698

699 **Electrophysiology**

700 *EEN1<sup>fl/fl</sup>* mice within 24 h after birth were co-injected with high-titer AAV stock carrying  
701 pAOV-CAMKII-mCherry-2A-Cre (AAV-mCherry-2A-Cre) and  
702 pAAV-CaMKIIa-EGFP-2A-MCS-3FLAG-EEN1 or mutants of EEN1 (about  $1 \sim 5 \times 10^{13}$   
703 IU/ml). Newborns were anesthetized on ice for 5 minutes and then mounted in a custom

704 ceramic mold to make the head level in the X - and Y- axes. Lambda was set as  $(X, Y) = (0, 0)$ .  
705 Zero point of Z - axis was the position at which the injecting needle penetrated the skin.  
706 About 10 nl viral solution was injected at each of the seven sites  $((X, Y, Z) = (1.2, 1.2, 1.4/$   
707  $1.0/ 0.6)$  and  $(1.5, 1.0, 1.7/ 1.3/ 0.9/ 0.5))$  targeting the hippocampus at each cerebral  
708 hemisphere with microsyringe (Sutter Instrument) and a beveled glass injection pipette.  
709 Injected pups were returned to home cage and used for recording two to three weeks  
710 afterward. Transverse 350  $\mu\text{m}$  hippocampal slices were cut from viral injected *EENI<sup>fl/fl</sup>* mice  
711 on a Leica vibratome (VT1000 S) in high sucrose cutting solution containing (in mM): KCl  
712 2.5,  $\text{NaH}_2\text{PO}_4$  1.25,  $\text{NaHCO}_3$  25,  $\text{CaCl}_2$  0.50,  $\text{MgSO}_4$  7, sucrose 210, glucose 10, Na-ascorbic  
713 acid 1.3. Freshly cut slices were placed in an incubating chamber containing ACSF, and  
714 recovered at 32°C for about 20 min followed by 60 min at room temperature before recording.  
715 The slices were perfused with ACSF containing GABAA receptor antagonists PTX (100  $\mu\text{M}$ )  
716 / Bic (10  $\mu\text{M}$ ) and saturated with 95%  $\text{O}_2/5\%$   $\text{CO}_2$  in whole-cell LTP experiments. CA1  
717 pyramidal cells were voltage-clamped at -70 mV and AMPAR EPSCs were evoked by  
718 stimulation at SC with concentric electrode (FHC CBBRC75). LTP was induced by  
719 stimulating SC axons at 2 Hz for 90 s while clamping the cell at 0 mV, after recording a stable  
720 3- to 5-min baseline, but no more than 6 min after breaking into the cell (Diaz-Alonso et al.,  
721 2017; Granger et al., 2013). To minimize run-up of baseline responses during LTP, cells were  
722 held cell-attached for about 1 to 2 min before breaking into the cell.

723

#### 724 **Stereotaxic injection and Behavioral tests**

725 Nine-week-old sexually naive male and female mice were anesthetized and stereotactically

726 injected with viral particles in the hippocampal CA1 region as described (Yang et al., 2018).  
727 The virus-injected mice were tested for behavior two weeks later. Morris water maze and fear  
728 conditioning tests were performed as previously described (Yang et al., 2018). We observed  
729 no sex-related difference in behaviors and the results were pooled together.

730

### 731 **Statistical analysis**

732 All data were presented as the mean  $\pm$  SEM. GraphPad Prism 5 (GraphPad Software, LaJolla,  
733 CA) was used for statistical analysis. For two-sample comparisons vs. controls, unpaired  
734 Student's t-test was used except where noted. One-way analysis of variance with a Dunnett's  
735 multiple-comparison or Newman-Keuls multiple comparison *hoc* test was used to evaluate  
736 statistical significance of three or more groups of samples. A *p* value of less than 0.05 was  
737 considered statistically significant.

738

### 739 **References**

740 Arellano, J.I., Benavides-Piccione, R., Defelipe, J., and Yuste, R. (2007). Ultrastructure of dendritic  
741 spines: correlation between synaptic and spine morphologies. *Front Neurosci* *1*, 131-143.  
742 Bosch, M., Castro, J., Saneyoshi, T., Matsuno, H., Sur, M., and Hayashi, Y. (2014). Structural and  
743 Molecular Remodeling of Dendritic Spine Substructures during Long-Term Potentiation. *Neuron* *82*,  
744 444-459.  
745 Boucrot, E., Ferreira, A.P., Almeida-Souza, L., Debard, S., Vallis, Y., Howard, G., Bertot, L., Sauvonnnet, N.,  
746 and McMahon, H.T. (2015). Endophilin marks and controls a clathrin-independent endocytic pathway.  
747 *Nature* *517*, 460-465.

748 Chazeau, A., and Giannone, G. (2016). Organization and dynamics of the actin cytoskeleton during  
749 dendritic spine morphological remodeling. *Cellular and molecular life sciences : CMLS* **73**, 3053-3073.

750 Chazeau, A., Mehidi, A., Nair, D., Gautier, J.J., Leduc, C., Chamma, I., Kage, F., Kechkar, A., Thoumine, O.,  
751 Rottner, K., *et al.* (2014). Nanoscale segregation of actin nucleation and elongation factors determines  
752 dendritic spine protrusion. *Embo j* **33**, 2745-2764.

753 Chen, Y., Deng, L., Maeno-Hikichi, Y., Lai, M., Chang, S., Chen, G., and Zhang, J.F. (2003). Formation of  
754 an endophilin-Ca<sup>2+</sup> channel complex is critical for clathrin-mediated synaptic vesicle endocytosis. *Cell*  
755 **115**, 37-48.

756 Chowdhury, S., Shepherd, J.D., Okuno, H., Lyford, G., Petralia, R.S., Plath, N., Kuhl, D., Huganir, R.L., and  
757 Worley, P.F. (2006). Arc/Arg3.1 interacts with the endocytic machinery to regulate AMPA receptor  
758 trafficking. *Neuron* **52**, 445-459.

759 Corponi, F., Bonassi, S., Vieta, E., Albani, D., Frustaci, A., Ducci, G., Landi, S., Boccia, S., Serretti, A., and  
760 Fabbri, C. (2019). Genetic basis of psychopathological dimensions shared between schizophrenia and  
761 bipolar disorder. *Prog Neuropsychopharmacol Biol Psychiatry* **89**, 23-29.

762 Diaz-Alonso, J., Sun, Y.J., Granger, A.J., Levy, J.M., Blankenship, S.M., and Nicoll, R.A. (2017).  
763 Subunit-specific role for the amino-terminal domain of AMPA receptors in synaptic targeting. *Proc Natl*  
764 *Acad Sci U S A* **114**, 7136-7141.

765 Fortin, D.A., Davare, M.A., Srivastava, T., Brady, J.D., Nygaard, S., Derkach, V.A., and Soderling, T.R.  
766 (2010). Long-term potentiation-dependent spine enlargement requires synaptic Ca<sup>2+</sup>-permeable  
767 AMPA receptors recruited by CaM-kinase I. *J Neurosci* **30**, 11565-11575.

768 Gallop, J.L., Jao, C.C., Kent, H.M., Butler, P.J., Evans, P.R., Langen, R., and McMahon, H.T. (2006).  
769 Mechanism of endophilin N-BAR domain-mediated membrane curvature. *EMBO J* **25**, 2898-2910.

770 Goudarzi, M., Tarbashevich, K., Mildner, K., Begemann, I., Garcia, J., Paksa, A., Reichman-Fried, M.,  
771 Mahabaleshwar, H., Blaser, H., Hartwig, J., *et al.* (2017). Bleb Expansion in Migrating Cells Depends on  
772 Supply of Membrane from Cell Surface Invaginations. *Dev Cell* 43, 577-587.e575.  
773 Granger, A.J., Shi, Y., Lu, W., Cerpas, M., and Nicoll, R.A. (2013). LTP requires a reserve pool of  
774 glutamate receptors independent of subunit type. *Nature* 493, 495-500.  
775 Guo, Y., Li, D., Zhang, S., Yang, Y., Liu, J.J., Wang, X., Liu, C., Milkie, D.E., Moore, R.P., Tulu, U.S., *et al.*  
776 (2018). Visualizing Intracellular Organelle and Cytoskeletal Interactions at Nanoscale Resolution on  
777 Millisecond Timescales. *Cell* 175, 1430-1442.e1417.  
778 Harris, K.M., and Stevens, J.K. (1989). Dendritic spines of CA 1 pyramidal cells in the rat hippocampus:  
779 serial electron microscopy with reference to their biophysical characteristics. *J Neurosci* 9, 2982-2997.  
780 Harvey, C.D., and Svoboda, K. (2007). Locally dynamic synaptic learning rules in pyramidal neuron  
781 dendrites. *Nature* 450, 1195-1200.  
782 Hayashi-Takagi, A., Yagishita, S., Nakamura, M., Shirai, F., Wu, Y.I., Loshbaugh, A.L., Kuhlman, B., Hahn,  
783 K.M., and Kasai, H. (2015). Labelling and optical erasure of synaptic memory traces in the motor cortex.  
784 *Nature*.  
785 Hedrick, N.G., Harward, S.C., Hall, C.E., Murakoshi, H., McNamara, J.O., and Yasuda, R. (2016). Rho  
786 GTPase complementation underlies BDNF-dependent homo- and heterosynaptic plasticity. *Nature* 538,  
787 104-108.  
788 Hedrick, N.G., and Yasuda, R. (2017). Regulation of Rho GTPase proteins during spine structural  
789 plasticity for the control of local dendritic plasticity. *Curr Opin Neurobiol* 45, 193-201.  
790 Herring, B.E., and Nicoll, R.A. (2016). Long-Term Potentiation: From CaMKII to AMPA Receptor  
791 Trafficking. *Annual review of physiology* 78, 351-365.

792 Hiester, B.G., Becker, M.I., Bowen, A.B., Schwartz, S.L., and Kennedy, M.J. (2018). Mechanisms and  
793 Role of Dendritic Membrane Trafficking for Long-Term Potentiation. *Frontiers in cellular neuroscience*  
794 *12*, 391.

795 Honkura, N., Matsuzaki, M., Noguchi, J., Ellis-Davies, G.C., and Kasai, H. (2008). The subspine  
796 organization of actin fibers regulates the structure and plasticity of dendritic spines. *Neuron* *57*,  
797 719-729.

798 Jaworski, J., Kapitein, L.C., Gouveia, S.M., Dortland, B.R., Wulf, P.S., Grigoriev, I., Camera, P., Spangler,  
799 S.A., Di Stefano, P., Demmers, J., *et al.* (2009). Dynamic microtubules regulate dendritic spine  
800 morphology and synaptic plasticity. *Neuron* *61*, 85-100.

801 Kliesch, T.T., Dietz, J., Turco, L., Halder, P., Polo, E., Tarantola, M., Jahn, R., and Janshoff, A. (2017).  
802 Membrane tension increases fusion efficiency of model membranes in the presence of SNAREs.  
803 *Scientific reports* *7*, 12070.

804 Kopec, C.D., Li, B., Wei, W., Boehm, J., and Malinow, R. (2006). Glutamate receptor exocytosis and  
805 spine enlargement during chemically induced long-term potentiation. *J Neurosci* *26*, 2000-2009.

806 Matsuzaki, M., Ellis-Davies, G.C., Nemoto, T., Miyashita, Y., Iino, M., and Kasai, H. (2001). Dendritic  
807 spine geometry is critical for AMPA receptor expression in hippocampal CA1 pyramidal neurons. *Nat*  
808 *Neurosci* *4*, 1086-1092.

809 Matsuzaki, M., Honkura, N., Ellis-Davies, G.C., and Kasai, H. (2004). Structural basis of long-term  
810 potentiation in single dendritic spines. *Nature* *429*, 761-766.

811 Mikhaylova, M., Bar, J., van Bommel, B., Schatzle, P., YuanXiang, P., Raman, R., Hradsky, J., Konietzny, A.,  
812 Loktionov, E.Y., Reddy, P.P., *et al.* (2018). Caldendrin Directly Couples Postsynaptic Calcium Signals to  
813 Actin Remodeling in Dendritic Spines. *Neuron* *97*, 1110-1125 e1114.



814 Milosevic, I., Giovedi, S., Lou, X., Raimondi, A., Collesi, C., Shen, H., Paradise, S., O'Toole, E., Ferguson,  
815 S., Cremona, O., *et al.* (2011). Recruitment of endophilin to clathrin-coated pit necks is required for  
816 efficient vesicle uncoating after fission. *Neuron* *72*, 587-601.

817 Murakoshi, H., Wang, H., and Yasuda, R. (2011). Local, persistent activation of Rho GTPases during  
818 plasticity of single dendritic spines. *Nature* *472*, 100-104.

819 Murakoshi, H., and Yasuda, R. (2012). Postsynaptic signaling during plasticity of dendritic spines.  
820 *Trends Neurosci* *35*, 135-143.

821 Murdoch, J.D., Rostosky, C.M., Gowrisankaran, S., Arora, A.S., Soukup, S.F., Vidal, R., Capece, V.,  
822 Freytag, S., Fischer, A., Verstreken, P., *et al.* (2016). Endophilin-A Deficiency Induces the Foxo3a-Fbxo32  
823 Network in the Brain and Causes Dysregulation of Autophagy and the Ubiquitin-Proteasome System.  
824 *Cell reports* *17*, 1071-1086.

825 Myers, M.D., Ryazantsev, S., Hicke, L., and Payne, G.S. (2016). Calmodulin Promotes N-BAR  
826 Domain-Mediated Membrane Constriction and Endocytosis. *Dev Cell* *37*, 162-173.

827 Nabavi, S., Fox, R., Proulx, C.D., Lin, J.Y., Tsien, R.Y., and Malinow, R. (2014). Engineering a memory with  
828 LTD and LTP. *Nature* *511*, 348-352.

829 Nakahata, Y., and Yasuda, R. (2018). Plasticity of Spine Structure: Local Signaling, Translation and  
830 Cytoskeletal Reorganization. *Frontiers in synaptic neuroscience* *10*.

831 Niu, Y., Zhang, C., Sun, Z., Hong, Z., Li, K., Sun, D., Yang, Y., Tian, C., Gong, W., and Liu, J.J. (2013).  
832 PtdIns(4)P regulates retromer-motor interaction to facilitate dynein-cargo dissociation at the  
833 trans-Golgi network. *Nat Cell Biol* *15*, 417-429.

834 Noguchi, J., Hayama, T., Watanabe, S., Ucar, H., Yagishita, S., Takahashi, N., and Kasai, H. (2016).  
835 State-dependent diffusion of actin-depolymerizing factor/cofilin underlies the enlargement and

- 836 shrinkage of dendritic spines. *Scientific reports* 6, 32897.
- 837 Obashi, K., Matsuda, A., Inoue, Y., and Okabe, S. (2019). Precise Temporal Regulation of Molecular  
838 Diffusion within Dendritic Spines by Actin Polymers during Structural Plasticity. *Cell Reports* 27,  
839 1503-1515.e1508.
- 840 Okamoto, K., Nagai, T., Miyawaki, A., and Hayashi, Y. (2004). Rapid and persistent modulation of actin  
841 dynamics regulates postsynaptic reorganization underlying bidirectional plasticity. *Nat Neurosci* 7,  
842 1104-1112.
- 843 Otsu, N. (1979). A Threshold Selection Method from Gray-Level Histograms. *IEEE Transactions on*  
844 *Systems, Man, and Cybernetics* 9, 62-66.
- 845 Park, M., Penick, E.C., Edwards, J.G., Kauer, J.A., and Ehlers, M.D. (2004). Recycling endosomes supply  
846 AMPA receptors for LTP. *Science* 305, 1972-1975.
- 847 Park, M., Salgado, J.M., Ostroff, L., Helton, T.D., Robinson, C.G., and Harris, K.M. (2006).  
848 Plasticity-Induced Growth of Dendritic Spines by Exocytic Trafficking from Recycling Endosomes.  
849 *Neuron* 52.
- 850 Reinhard, J.R., Kriz, A., Galic, M., Angliker, N., Rajalu, M., Vogt, K.E., and Ruegg, M.A. (2016). The  
851 calcium sensor Copine-6 regulates spine structural plasticity and learning and memory. *Nature*  
852 *communications* 7, 11613.
- 853 Ren, Y., Xu, H.W., Davey, F., Taylor, M., Aiton, J., Coote, P., Fang, F., Yao, J., Chen, D., Chen, J.X., *et al.*  
854 (2008). Endophilin I expression is increased in the brains of Alzheimer disease patients. *J Biol Chem*  
855 283, 5685-5691.
- 856 Renard, H.F., Simunovic, M., Lemiére, J., Boucrot, E., Garcia-Castillo, M.D., Arumugam, S., Chambon, V.,  
857 Lamaze, C., Wunder, C., Kenworthy, A.K., *et al.* (2015). Endophilin-A2 functions in membrane scission

858 in clathrin-independent endocytosis. *Nature* *517*, 493-496.

859 Ringstad, N., Nemoto, Y., and De Camilli, P. (1997). The SH3p4/Sh3p8/SH3p13 protein family: binding  
860 partners for synaptojanin and dynamin via a Grb2-like Src homology 3 domain. *Proc Natl Acad Sci U S*  
861 *A* *94*, 8569-8574.

862 Saneyoshi, T., Matsuno, H., Suzuki, A., Murakoshi, H., Hedrick, N.G., Agnello, E., O'Connell, R., Stratton,  
863 M.M., Yasuda, R., and Hayashi, Y. (2019). Reciprocal Activation within a Kinase-Effector Complex  
864 Underlying Persistence of Structural LTP. *Neuron* *102*, 1199-1210 e1196.

865 Schnoor, M., Stradal, T.E., and Rottner, K. (2018). Cortactin: Cell Functions of A Multifaceted  
866 Actin-Binding Protein. *Trends in cell biology* *28*, 79-98.

867 Schuske, K.R., Richmond, J.E., Matthies, D.S., Davis, W.S., Runz, S., Rube, D.A., van der Bliek, A.M., and  
868 Jorgensen, E.M. (2003). Endophilin is required for synaptic vesicle endocytosis by localizing  
869 synaptojanin. *Neuron* *40*, 749-762.

870 Simon, C., Kusters, R., Caorsi, V., Allard, A., Abou-Ghali, M., Manzi, J., Di Cicco, A., Levy, D., Lenz, M.,  
871 Joanny, J.F., *et al.* (2019). Actin dynamics drive cell-like membrane deformation. *Nature Physics* *15*,  
872 602-+.

873 Smith, K.R., Kopeikina, K.J., Fawcett-Patel, J.M., Leaderbrand, K., Gao, R., Schurmann, B., Myczek, K.,  
874 Radulovic, J., Swanson, G.T., and Penzes, P. (2014). Psychiatric Risk Factor ANK3/Ankyrin-G  
875 Nanodomains Regulate the Structure and Function of Glutamatergic Synapses. *Neuron* *84*, 399-415.

876 Soukup, S.F., Kuenen, S., Vanhauwaert, R., Manetsberger, J., Hernandez-Diaz, S., Swerts, J.,  
877 Schoovaerts, N., Vilain, S., Gounko, N.V., Vints, K., *et al.* (2016). A LRRK2-Dependent EndophilinA  
878 Phosphoswitch Is Critical for Macroautophagy at Presynaptic Terminals. *Neuron* *92*, 829-844.

879 Spiering, D., and Hodgson, L. (2011). Dynamics of the Rho-family small GTPases in actin regulation and

880 motility. *Cell Adh Migr* 5, 170-180.

881 Uruno, T., Liu, J., Zhang, P., Fan, Y., Egile, C., Li, R., Mueller, S.C., and Zhan, X. (2001). Activation of  
882 Arp2/3 complex-mediated actin polymerization by cortactin. *Nat Cell Biol* 3, 259-266.

883 Verstreken, P., Koh, T.W., Schulze, K.L., Zhai, R.G., Hiesinger, P.R., Zhou, Y., Mehta, S.Q., Cao, Y., Roos, J.,  
884 and Bellen, H.J. (2003). Synaptojanin is recruited by endophilin to promote synaptic vesicle uncoating.  
885 *Neuron* 40, 733-748.

886 Watanabe, S., Mamer, L.E., Raychaudhuri, S., Luvsanjav, D., Eisen, J., Trimbuch, T., Söhl-Kielczynski, B.,  
887 Fenske, P., Milosevic, I., Rosenmund, C., *et al.* (2018). Synaptojanin and Endophilin Mediate Neck  
888 Formation during Ultrafast Endocytosis. *Neuron* 98, 1184-1197.e1186.

889 Weaver, A.M., Karginov, A.V., Kinley, A.W., Weed, S.A., Li, Y., Parsons, J.T., and Cooper, J.A. (2001).  
890 Cortactin promotes and stabilizes Arp2/3-induced actin filament network formation. *Current Biology*  
891 11, 370-374.

892 Yang, Y., Chen, J., Guo, Z., Deng, S., Du, X., Zhu, S., Ye, C., Shi, Y.S., and Liu, J.J. (2018). Endophilin A1  
893 Promotes Actin Polymerization in Dendritic Spines Required for Synaptic Potentiation. *Frontiers in*  
894 *molecular neuroscience* 11, 177.

895 Yang, Y., Wang, X.B., Frerking, M., and Zhou, Q. (2008). Spine expansion and stabilization associated  
896 with long-term potentiation. *J Neurosci* 28, 5740-5751.

897 Yang, Y., Wei, M., Xiong, Y., Du, X., Zhu, S., Yang, L., Zhang, C., and Liu, J.J. (2015). Endophilin A1  
898 regulates dendritic spine morphogenesis and stability through interaction with p140Cap. *Cell Res* 25,  
899 496-516.

900 Yu, Q., Wang, Y., Du, F., Yan, S., Hu, G., Origlia, N., Rutigliano, G., Sun, Q., Yu, H., Ainge, J., *et al.* (2018a).  
901 Overexpression of endophilin A1 exacerbates synaptic alterations in a mouse model of Alzheimer's

902 disease. Nature communications 9, 2968.

903 Yu, X., Xu, T., Ou, S., Yuan, J., Deng, J., Li, R., Yang, J., Liu, X., Li, Q., and Chen, Y. (2018b). Endophilin A1

904 mediates seizure activity via regulation of AMPARs in a PTZ-kindled epileptic mouse model. Exp Neurol

905 304, 41-57.

906

907

908 **Additional files**

909 Supplementary files:

910 (A) Figure supplements

911 **Figure 3 - figure supplement 1.** Endophilin A1 does not bind  $\text{Ca}^{2+}$ .

912 **Figure 4 - figure supplement 1.** I154 and L158 are required for endophilin A1 binding to  
913 calmodulin.

914 **Figure 5 - figure supplement 1.** Calmodulin-dependent increase in the number of endophilin  
915 A1 nanodomains correlates with spine size during the initial Phase of sLTP.

916 **Figure 6 - figure supplement 1.** In response to  $\text{Ca}^{2+}$ /calmodulin, endophilin A1 localizes to  
917 the plasma membrane and recruits Arp2/3 via p140Cap.

918 (B) Supplementary Videos

919 **Video 1.** Morphological changes and actin dynamics in *EENI* WT dendrite before and during  
920 glycine-induced sLTP.

921 Dendrites of DIV16 *EENI* WT mouse hippocampal neurons co-expressing mGFP (green) and  
922 the F-actin probe LifeAct-mCherry (red) were imaged every 5 s by GI-SIM for 12 frames  
923 before and 48 frames after glycine treatment. Video plays at 5 frames/s. Scale bars, 5  $\mu\text{m}$  (left)  
924 and 1  $\mu\text{m}$  (right).

925 **Video 2.** Morphological changes and actin dynamics in *EENI* KO dendrite before and during  
926 glycine-induced sLTP.

927 Dendrites of DIV16 *EENI* KO mouse hippocampal neurons co-expressing mGFP (green) and  
928 the F-actin probe LifeAct-mCherry (red) were imaged every 5 s by GI-SIM for 12 frames  
929 before and 48 frames after glycine treatment. Video plays at 5 frames/s. Scale bars, 5  $\mu\text{m}$  (left)

930 and 1  $\mu\text{m}$  (right).

931 **Video 3.** Spatiotemporal relationship of spine growth and actin polymerization in *EENI* WT

932 spines before and during glycine-induced LTP.

933 Increases in spine head area and F-actin signal intensity are color coded green and red,

934 respectively. Video plays at 5 frames/s. Scale bars, 5  $\mu\text{m}$  (left) and 1  $\mu\text{m}$  (right).

935 **Video 4.** Spatiotemporal relationship of spine growth and actin polymerization in *EENI* KO

936 spines before and during glycine-induced LTP.

937 Increases in spine head area and F-actin signal intensity are color coded green and red,

938 respectively. Video plays at 5 frames/s. Scale bars, 5  $\mu\text{m}$  (left) and 1  $\mu\text{m}$  (right).

939

940 **Figures**

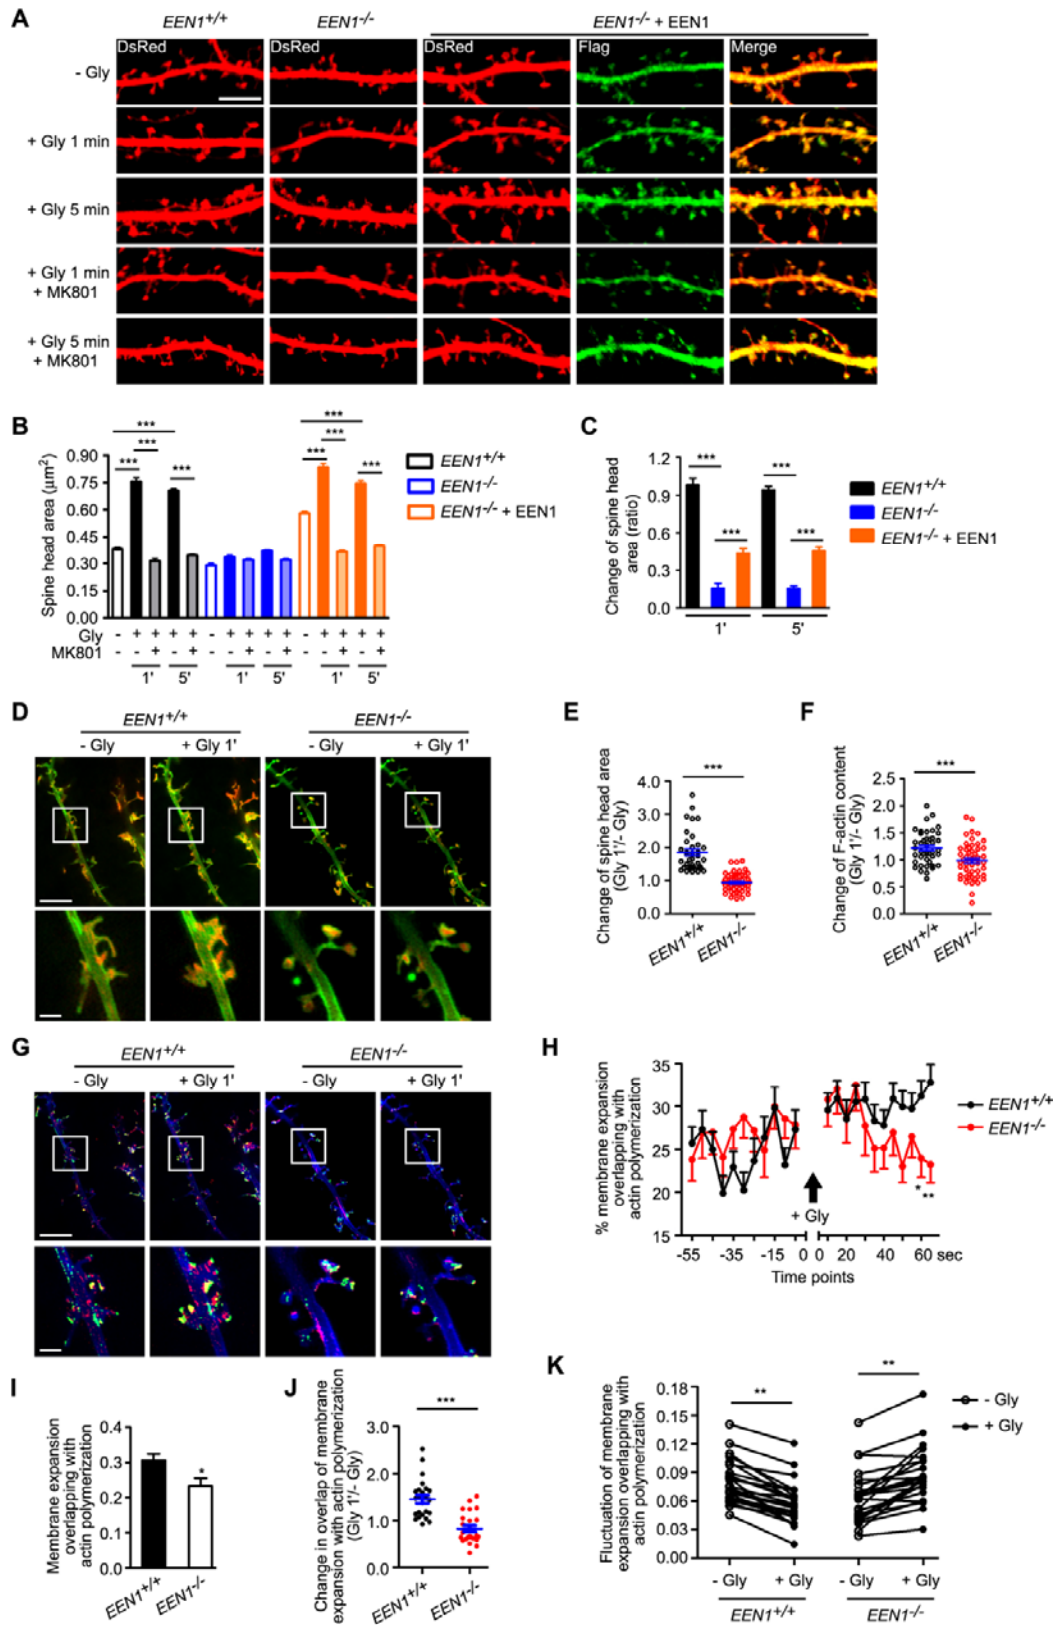

941



942 **Figure 1.** Endophilin A1 is required for spine expansion and actin polymerization in the initial  
943 Phase of sLTP.

944 (A) Mouse hippocampal neurons were co-transfected with pLL3.7-DsRed (volume marker)  
945 and pCMV-Tag2B (Flag vector) or pCMV-Tag2B-endophilin A1 (Flag-EEN1) on DIV12,  
946 pre-treated with DMSO (vehicle control) or MK801 (NMDAR antagonist) and chemically  
947 induced LTP with glycine (Gly) on DIV16. Neurons were fixed 1 min or 5 min after glycine  
948 application, stained with antibodies to Flag and imaged by confocal microscopy. Bar = 5  $\mu$ m.

949 (B) Quantification of spine size in (A).  $N \geq 13$  cells,  $n \geq 563$  spines per group. (C) Changes of  
950 spine size in (A). (D) GI-SIM imaging of *EEN1* WT and KO hippocampal neurons expressing  
951 mGFP and LifeAct-mCherry. Glycine was applied after imaging for 1 min and imaging was  
952 continued for 5 more minutes. Shown are representative still images right before and 1 min  
953 after glycine application. Lower panels are magnification of boxed areas in upper panels. Bars:  
954 5  $\mu$ m (upper) and 1  $\mu$ m (lower). (E, F) Quantitative analysis of spine size increase (E) or  
955 F-actin enrichment (F) in spines imaged by GI-SIM. (G) Spine membrane expansion  
956 overlapping with actin polymerization in D. Spine growth and increase in F-actin signals are  
957 color coded green and red, respectively. Bars: 5  $\mu$ m (upper) and 1  $\mu$ m (lower). (H)  
958 Quantification of fractions of expanded membrane overlapping with actin polymerization in  
959 individual spines of *EEN1* WT and KO neurons before and after glycine application at 5 s  
960 intervals. (I) Quantification of fractions of membrane expansion overlapping with actin  
961 polymerization at 1 min after glycine application in individual spines of *EEN1* WT and KO  
962 neurons. (J) Changes in the extent of overlap between membrane expansion and actin  
963 polymerization 1 min after glycine application in individual spines of *EEN1* WT and KO

964 neurons. Data are normalized to the time point right before glycine application. **(K)** Mean  
965 fluctuation of the overlap between membrane expansion and actin polymerization in  
966 individual spines within 1 min before and after glycine application for *EEN1* WT and KO  
967 neurons. Data represent mean  $\pm$  SEM in **(B)**, **(C)** and **(I)**. WT: N = 5 neurons and n = 24  
968 spines; KO: N = 6 neurons and n = 27 spines in **(E)**, **(F)** and **(H-K)**. \*  $p < 0.05$ , \*\*  $p < 0.01$ ,  
969 \*\*\*  $p < 0.001$ .  
970

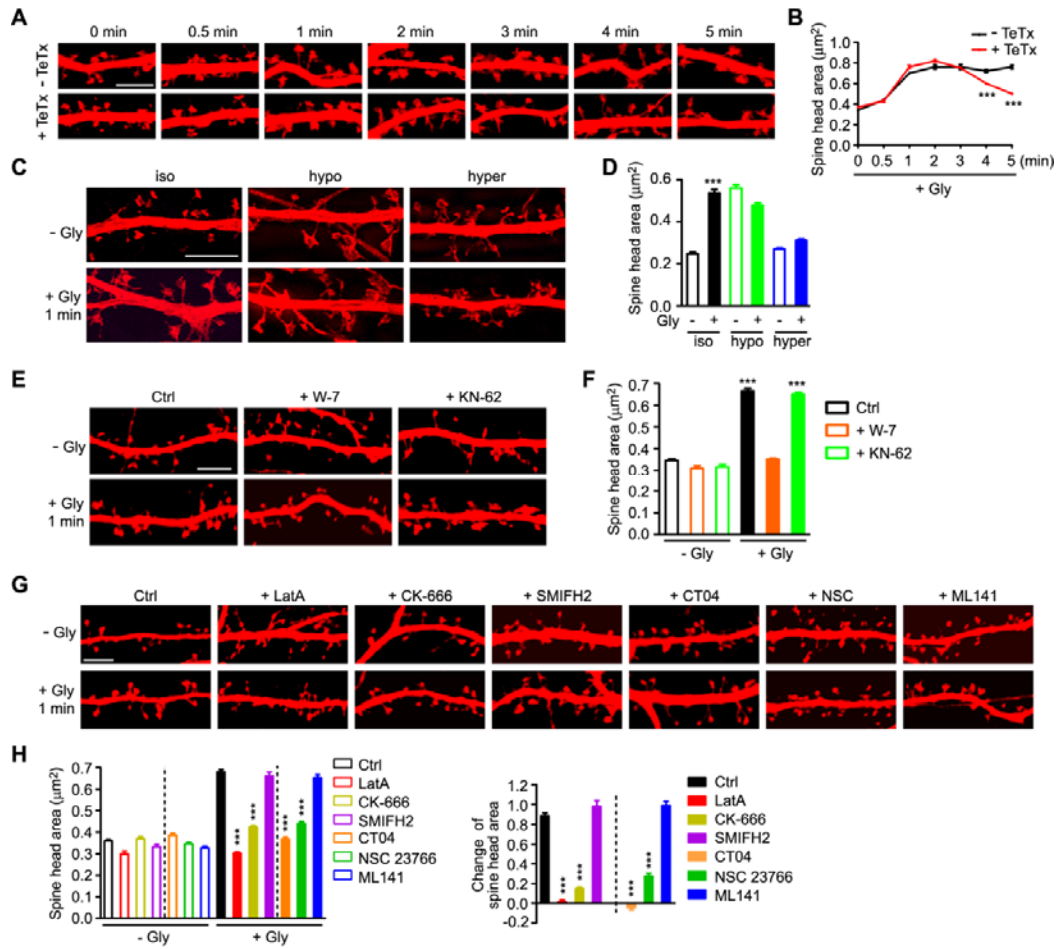

971

972 **Figure 2.** Membrane unfolding and branched actin polymerization are required for initiation  
973 of sLTP.

974 (A) Mouse hippocampal neurons transfected with pLL3.7-DsRed on DIV12 were pre-treated  
975 with DMSO or tetanus toxin (TeTx) for 10 min and chemically induced LTP with glycine on  
976 DIV16. Neurons were fixed at different time points after glycine application and imaged by  
977 confocal microscopy. Bar = 5  $\mu\text{m}$ . (B) Quantification of spine size in (A).  $N \geq 12$  neurons,  $n$   
978  $\geq 530$  spines per group, \*\*\*  $p < 0.001$ . (C) Effect of osmotic shock on spine enlargement 1  
979 min after glycine application. Neurons were pre-treated with iso-osmotic, hypo-osmotic or  
980 hyper-osmotic solution respectively for 10 min and chemically induced LTP in the same  
981 solution on DIV16. Neurons were fixed 1 min after glycine application and imaged by

982 3D-SIM microscopy. Bar = 4  $\mu\text{m}$ . **(D)** Quantification of spine size in **(C)**.  $N \geq 12$  neurons,  $n \geq$   
983 382 spines per group. **(E)** Effects of W-7 (calmodulin inhibitor) and KN-62 (CaMKII  
984 inhibitor) on spine enlargement 1 min after glycine application. Bar = 5  $\mu\text{m}$ . **(F)**  
985 Quantification of spine size in **(E)**.  $N \geq 12$  neurons,  $n \geq 504$  spines per group. **(G)** Effects of  
986 inhibitors for actin remodeling regulators on spine enlargement 1 min after glycine  
987 application. Shown are representative confocal images. Bar = 5  $\mu\text{m}$ . CK-666: Arp2/3 inhibitor.  
988 SMIFH2: Formin inhibitor. CT04: RhoA inhibitor. NSC 23766: Rac1 inhibitor. ML 141:  
989 Cdc42 inhibitor. **(H, I)** Quantification of spine size (left) and changes in spine size (right) in  
990 **(G)**.  $N \geq 12$  neurons,  $n \geq 516$  spines per group. Data represent mean  $\pm$  SEM in **(B)**, **(D)**, **(F)**  
991 and **(H)**. \*\*\*  $p < 0.001$ .  
992

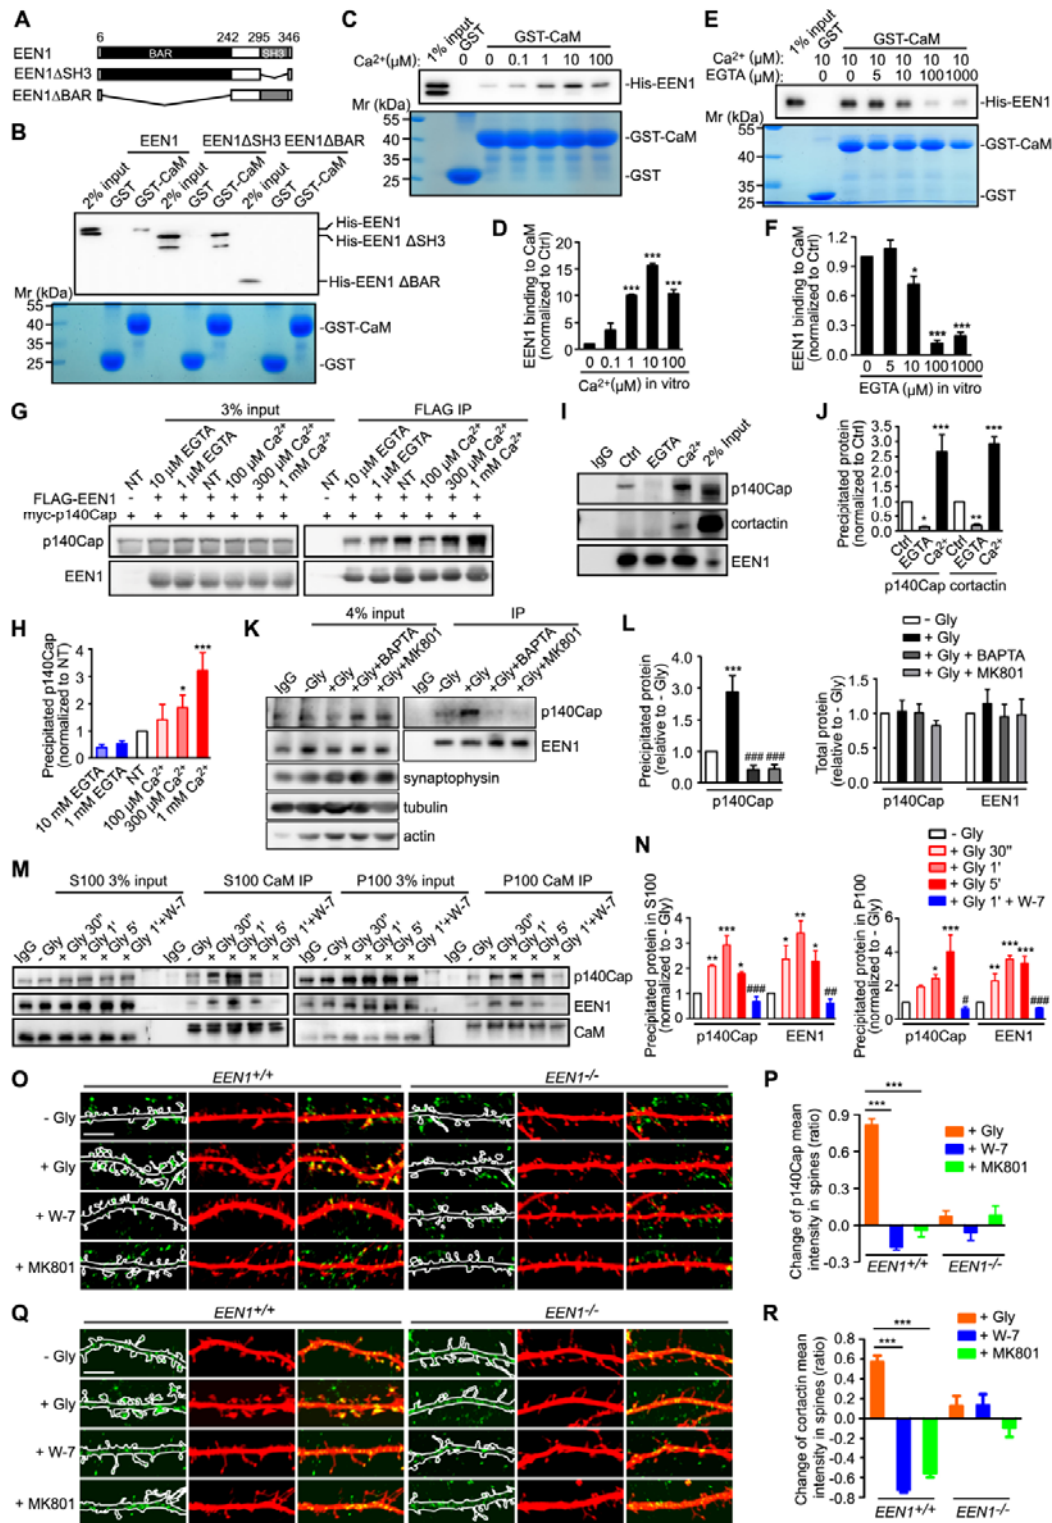

993

994 **Figure 3.** Ca<sup>2+</sup>/calmodulin enhances the interaction between endophilin A1 and p140Cap.

995 (A) Diagram showing the domain structure and fragments of endophilin A1 used in this study.

996 (B) Binding of His-tagged endophilin A1 full length, ΔSH3 and ΔBAR fragments to

997 GST-tagged calmodulin (CaM) in GST-pull down assay. **(C)** Effect of  $\text{Ca}^{2+}$  on binding of  
998 endophilin A1 to calmodulin in GST-pull down assay. **(D)** Quantification of  $\text{Ca}^{2+}$ -regulated  
999 endophilin A1 binding to calmodulin in **(C)**. N = 3 independent experiments. **(E)** Effect of  
1000 EGTA on binding of endophilin A1 to calmodulin in GST-pull down assay. **(F)** Quantification  
1001 of endophilin A1 binding to calmodulin in **(E)**. N = 5. **(G)** Effect of EGTA or  $\text{Ca}^{2+}$  on binding of  
1002 endophilin A1 to p140Cap in transiently transfected HEK293 cells in Flag IP assay. **(H)**  
1003 Quantification of endophilin A1 binding to p140Cap in **(G)**. N = 4. **(I)** Effect of EGTA or  $\text{Ca}^{2+}$   
1004 on binding of endophilin A1 to p140Cap in cultured neurons. Endogenous IP assay was  
1005 performed from lysates of mouse neurons with antibodies to endophilin A1. **(J)** Quantification  
1006 of endophilin A1 binding to p140Cap in **(I)**. N = 3. **(K)** Effect of BAPTA or MK801 on the  
1007 binding of endophilin A1 to p140Cap in neurons upon cLTP induction. **(L)** Quantification of  
1008 endophilin A1 binding to p140Cap and total protein levels of endophilin A1 or p140Cap in  
1009 **(K)**. N = 5. **(M)** Effect of W-7 on interactions between calmodulin and endophilin  
1010 A1/p140Cap upon cLTP induction. DIV16 neurons were collected and the cytosolic (S100)  
1011 and membrane (P100) fractions were used for immunoisolation with antibodies to calmodulin.  
1012 **(N)** Quantification of endophilin A1 and p140Cap precipitated by antibodies to calmodulin in  
1013 **(N)**. N = 3. **(O)** Effects of W-7 and MK801 on the amount of p140Cap in spines upon LTP  
1014 induction. Neurons transfected with pLL3.7-DsRed on DIV12 were pre-treated with DMSO,  
1015 W-7 or MK801 and chemically induced LTP on DIV16. Neurons were fixed 1 min after  
1016 glycine application, immunostained with antibodies to p140Cap (green) and imaged by  
1017 confocal microscopy. Bar = 5  $\mu\text{m}$ . **(P)** Quantification of changes in p140Cap mean intensity  
1018 in spines as compared with the control (- Gly) group in **(O)**. N  $\geq$  12 cells, n  $\geq$  464 spines per

1019 group. **(Q)** Same as **(O)** except that neurons were immunostained with antibodies to cortactin.  
1020 Bar = 5  $\mu$ m. **(R)** Quantification of changes in cortactin mean intensity in spines as compared  
1021 with the control (- Gly) group in **(Q)**.  $N \geq 11$  cells,  $n \geq 431$  spines per group. Data represent  
1022 mean  $\pm$  SEM in **(D)**, **(F)**, **(H)**, **(J)**, **(L)**, **(N)**, **(P)** and **(R)**. \*  $p < 0.05$ , \*\*  $p < 0.01$ , \*\*\*  $p <$   
1023 0.001, when compared with Ctrl, NT or - Gly. ###  $p < 0.001$  in **(L)**, when compared with +  
1024 Gly. #  $p < 0.05$ , ##  $p < 0.01$ , ###  $p < 0.001$  in **(N)**, when compared to + Gly 1’.  
1025 **Figure 3 - figure supplement 1.** Endophilin A1 does not bind  $Ca^{2+}$ .  
1026

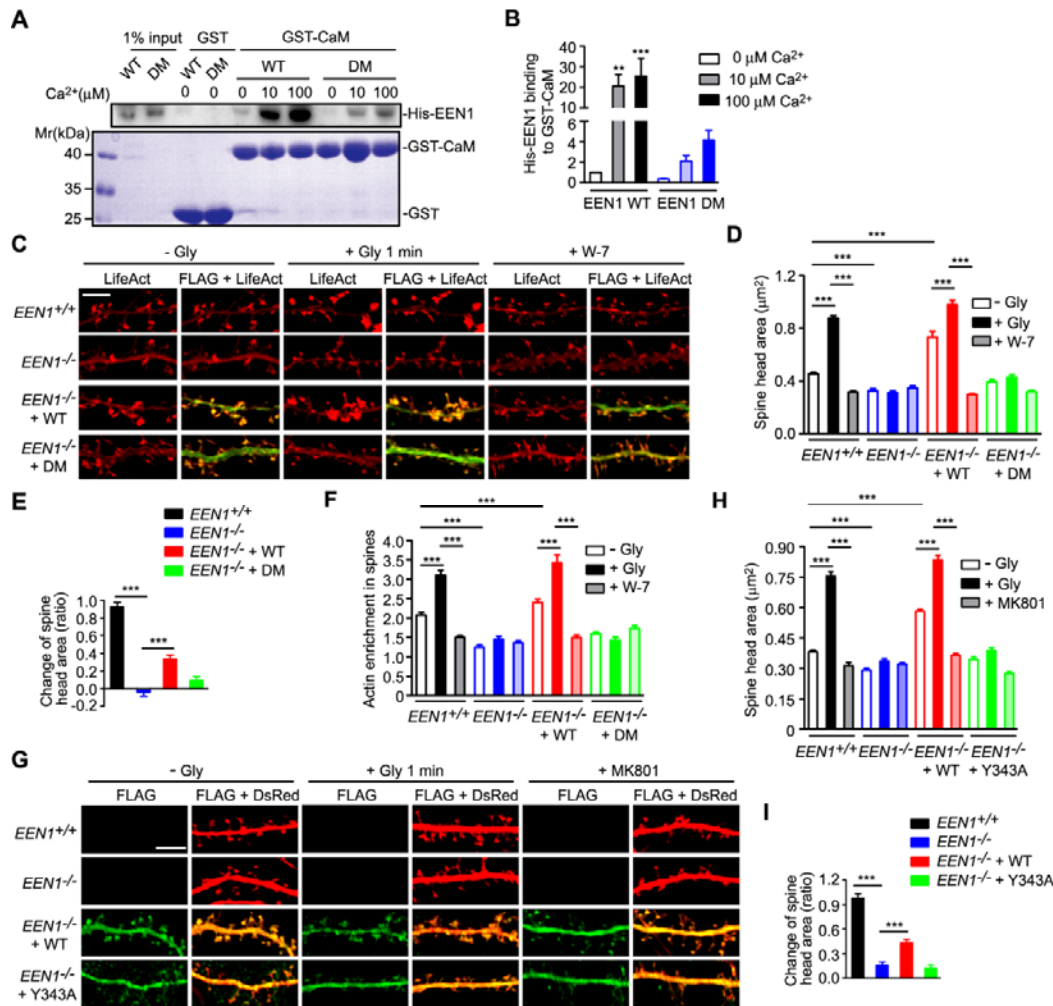

1027

1028 **Figure 4.** Ca<sup>2+</sup>/calmodulin promotes actin polymerization in spines via the endophilin

1029 A1-p140Cap pathway.

1030 (A) Effect of Ca<sup>2+</sup> on binding of EEN1 double mutant (DM) to calmodulin in GST-pull down

1031 assay. (B) Quantification of EEN1 DM binding to GST-CaM as compared with WT in (A). Y

1032 axis shows as two segments. N = 4, \*\*\* p < 0.001. (C) Cultured *EEN1*<sup>+/+</sup> and *EEN1*<sup>-/-</sup>

1033 hippocampal neurons co-transfected with LifeAct-mCherry and pCMV-Tag2B, and *EEN1*<sup>-/-</sup>

1034 hippocampal neurons co-transfected with LifeAct-mCherry and pCMV-Tag2B-EEN1 WT or

1035 pCMV-Tag2B-EEN1 DM on DIV12 were pre-treated with DMSO or W-7 and chemically

1036 induced LTP (cLTP) on DIV16. Neurons were fixed 1 min after glycine application and



1037 imaged by confocal microscopy. Bar = 5  $\mu$ m. **(D, E)** Quantification of spine size and changes  
1038 in spine size in **(C)**.  $N \geq 12$  neurons,  $n \geq 450$  spines per group. **(F)** Quantification of F-actin  
1039 enrichment in spines in **(C)**.  $N \geq 12$  neurons,  $n \geq 450$  spines per group. **(G)** Cultured *EENI*<sup>+/+</sup>  
1040 and *EENI*<sup>-/-</sup> hippocampal neurons co-transfected with pLL3.7-DsRed and pCMV-Tag2B, and  
1041 *EENI*<sup>-/-</sup> hippocampal neurons co-transfected with pLL3.7-DsRed and pCMV-Tag2B-EEN1  
1042 WT or pCMV-Tag2B-EEN1 Y343A on DIV12 were pre-treated with DMSO or MK801 and  
1043 chemically induced LTP (cLTP) on DIV16. Neurons were fixed 1 min after glycine  
1044 application and imaged by confocal microscopy. Bar = 5  $\mu$ m. **(H, I)** Quantification of spine  
1045 size and changes in spine size in **(G)**.  $N \geq 12$  neurons,  $n \geq 502$  spines per group. Data  
1046 represent mean  $\pm$  SEM in **(B)**, **(D)**, **(E)**, **(F)**, **(H)**, and **(I)**. \*\*  $p < 0.01$ , \*\*\*  $p < 0.001$  in **(B)**  
1047 when compared with 0  $\mu$ m Ca<sup>2+</sup>.

1048 **Figure 4 - figure supplement 1.** I154 and L158 are required for endophilin A1 binding to  
1049 calmodulin.

1050

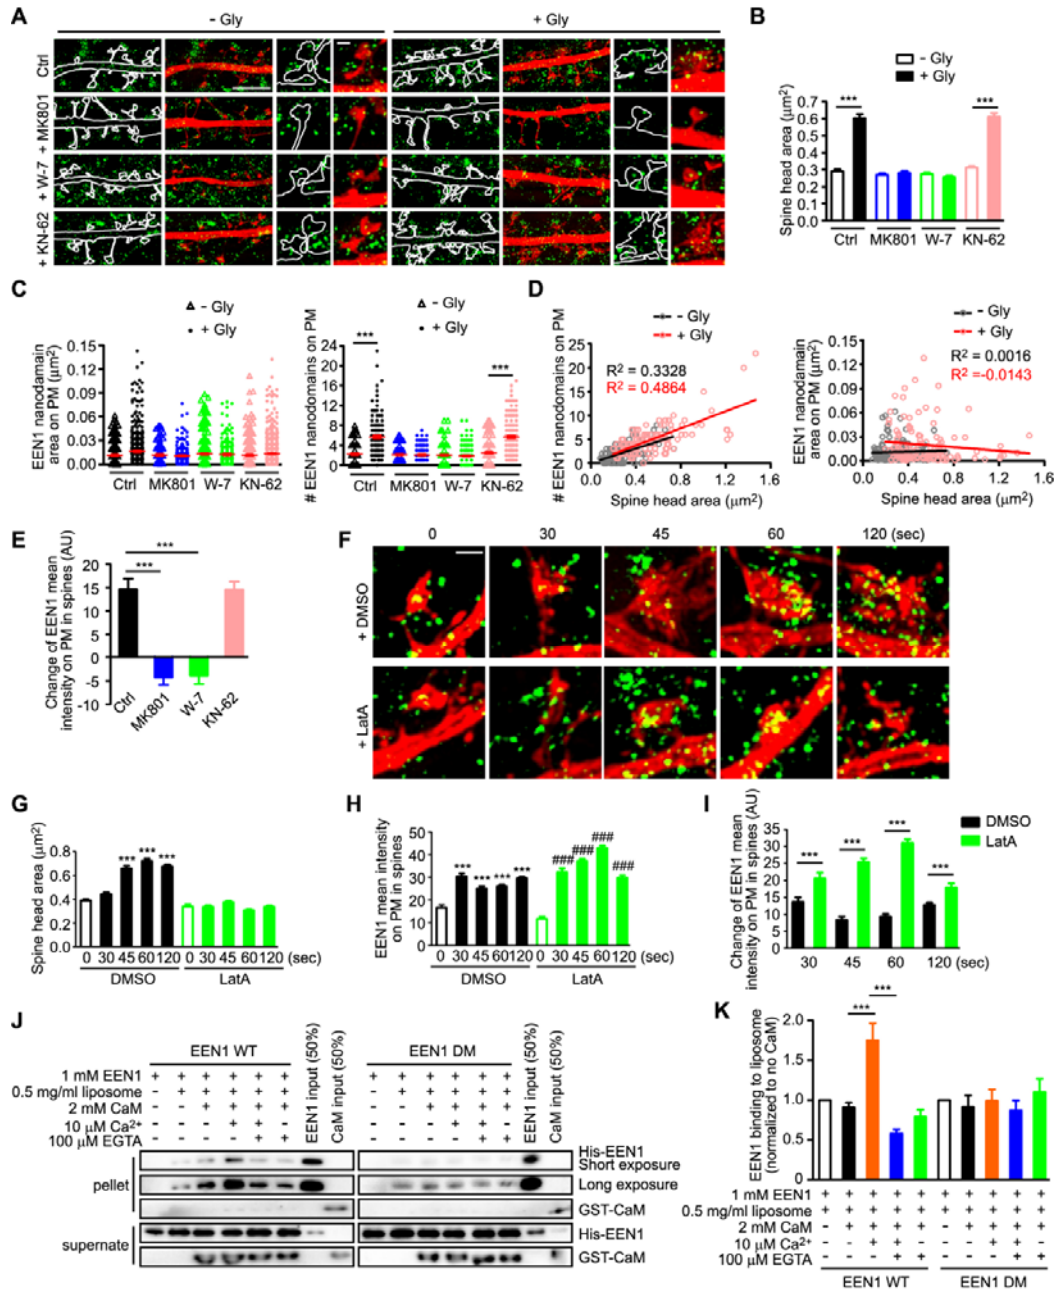

1051

1052 **Figure 5.** Ca<sup>2+</sup>/calmodulin-enhanced plasma membrane association of endophilin A1

1053 correlates with spine expansion.

1054 (A) DIV16 neurons were pre-treated with DMSO, W-7 or KN-62 and chemically induced LTP.

1055 Neurons were fixed 1 min after glycine application. Plasma membrane (PM)-localized

1056 endophilin A1 was immunostained and imaged by 3D-SIM. Spines were outlined manually.

1057 Bar = 4  $\mu\text{m}$  in left and center panels and 500 nm in magnified images in right panels. **(B)**  
1058 Quantification of spine size in **(A)**. **(C)** Quantification of the area and number of  
1059 PM-localized endophilin A1 nanodomains in spines in **(A)**. **(D)** Scatterplot of the number or  
1060 area of PM-localized endophilin A1 nanodomains versus the size of spine head for control (-  
1061 Gly,  $n = 278$  spines) and cLTP (+ Gly,  $n = 254$  spines) groups with linear fits. **(E)**  
1062 Quantification of changes in the mean intensity of PM-localized endophilin A1 in spines. **(F)**  
1063 DIV16 neurons were pre-treated with DMSO or LatA and chemically induced LTP. Neurons  
1064 were fixed at 30 s, 45 s, 60 s or 120 s after glycine application. PM-localized endophilin A1  
1065 was stained and imaged by 3D-SIM. Bar = 500 nm. **(G)** Quantification of spine size in **(F)**.  
1066 **(H)** Quantification of the mean intensity of PM-localized endophilin A1 in spines in **(F)**. **(I)**  
1067 Quantification of changes in the mean intensity of PM-localized endophilin A1 in spines in  
1068 **(F)**. **(J)** Effect of  $\text{Ca}^{2+}$ /calmodulin on binding of EEN1 WT or DM protein to membrane in  
1069 liposome sedimentation assay. **(K)** Quantification of endophilin A1 binding to liposome in **(J)**.  
1070  $N = 7$ . Data represent mean  $\pm$  SEM in B-E, G-I, and K. \*\*\*  $p < 0.001$ , when compared with -  
1071 Gly in **(G)** and **(H)**. ###  $p < 0.001$ , when compared with - Gly + LatA treatment in **(H)**.  $N \geq$   
1072 10 neurons,  $n \geq 254$  spines per group in **(B-E)**, and  $N \geq 10$  neurons,  $n \geq 241$  spines per group  
1073 in **(G-I)**.

1074 **Figure 5 - figure supplement 1.** Calmodulin-dependent increase in the number of endophilin  
1075 A1 nanodomains correlates with spine size during the initial phase of sLTP.

1076

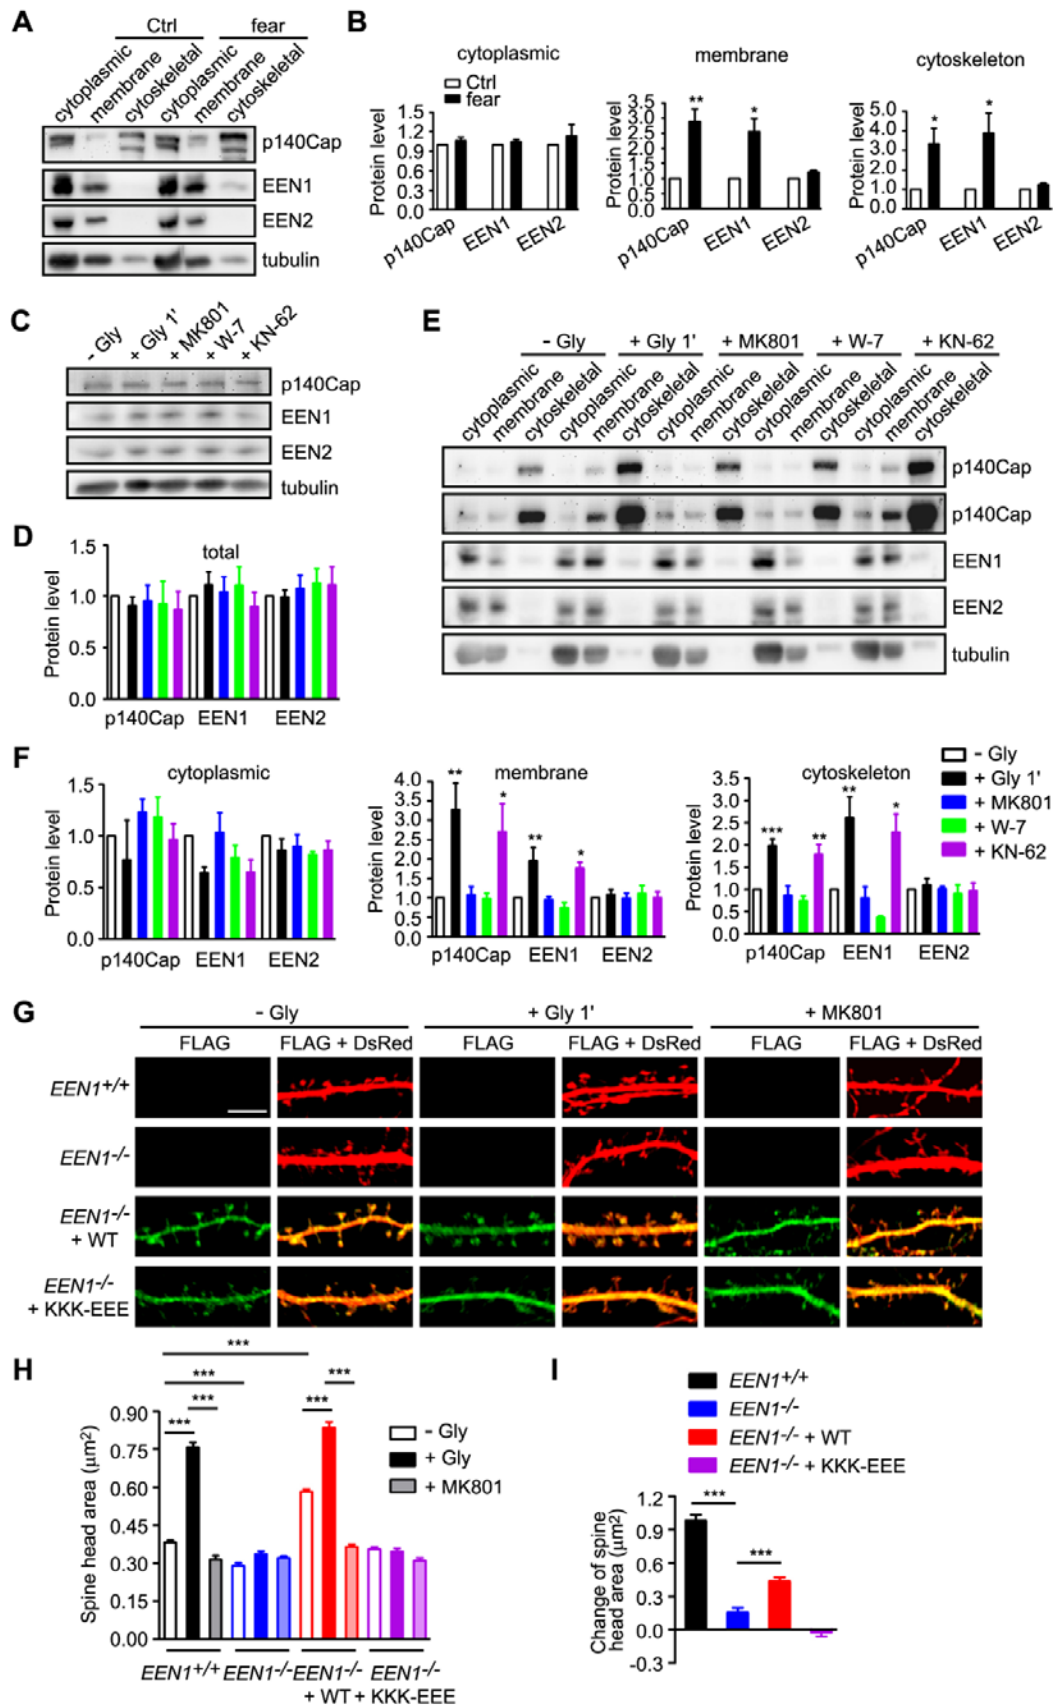

1078 **Figure 6.** Ca<sup>2+</sup>/calmodulin regulates the association of endophilin A1 and p140Cap with both  
1079 membrane and cytoskeleton upon LTP induction.

1080 (A) Immunoblotting of subcellular fractionations of mouse hippocampi from animals  
1081 subjected to fear training. (B) Quantification of protein levels of p140Cap, endophilin A1 or  
1082 endophilin A2 in cytoplasmic, membrane and cytoskeleton fractions in (A). N = 6 animals. (C)  
1083 Cultured neurons were pre-treated with DMSO, 10 μM MK801, W-7 or KN-62 and  
1084 chemically induced LTP on DIV16. Cell lysates were prepared 1 min after glycine application  
1085 and subjected to SDS-PAGE and immunoblotting. (D) Quantification of total protein levels in  
1086 (C). N = 5. (E) Effects of MK801, W-7 and KN-62 on subcellular distribution of protein  
1087 levels. Neurons were pre-treated with DMSO, MK801, W-7 or KN-62 and chemically  
1088 induced LTP on DIV16. Cells were collected and subjected to subcellular fractionation 1 min  
1089 after glycine application. (F) Quantification of protein levels in subcellular fractions in (E). N  
1090 = 5. (G) *EEN1*<sup>+/+</sup> and *EEN1*<sup>-/-</sup> hippocampal neurons co-transfected with pLL3.7-DsRed and  
1091 pCMV-Tag2B, and *EEN1*<sup>-/-</sup> hippocampal neurons co-transfected with pLL3.7-DsRed and  
1092 pCMV-Tag2B-EEN1 WT or pCMV-Tag2B-EEN1 KKK-EEE on DIV12 were pre-treated with  
1093 DMSO or MK801 and chemically induced LTP on DIV16. Neurons were fixed 1 min after  
1094 glycine application and imaged by confocal microscopy. Bar = 5 μm. (H, I) Quantification of  
1095 spine size or changes in spine size in (G). N ≥ 12 neurons, n ≥ 482 spines per group. Data  
1096 represented are mean ± SEM in (B), (D), (F), (H) and (I). \* *p* < 0.05, \*\* *p* < 0.01, \*\*\* *p* <  
1097 0.001 when compared to Ctrl or - Gly in (B) and (F).

1098 **Figure 6 - figure supplement 1.** In response to Ca<sup>2+</sup>/calmodulin, endophilin A1 localizes to  
1099 the plasma membrane and recruits Arp2/3 via p140Cap.

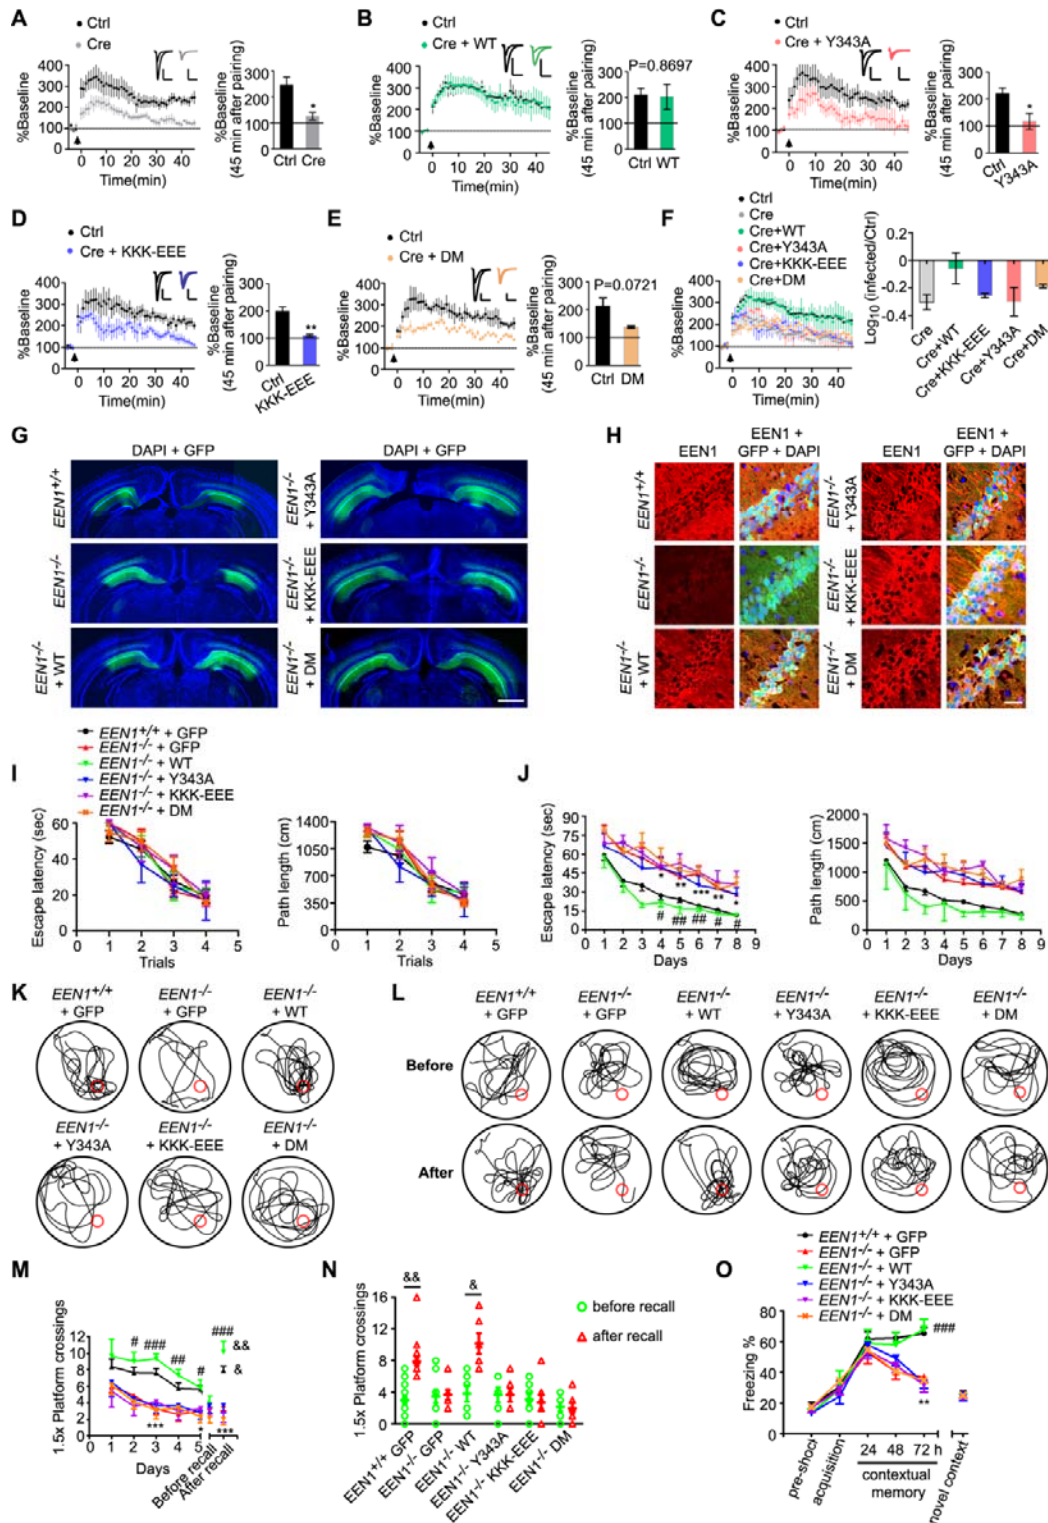

1100

1101 **Figure 7.** The calmodulin-, membrane- and p140Cap-binding capacities of endophilin A1 are

1102 required for LTP and long-term memory.

1103 (A-F) Rescue of the LTP impairment phenotype in *EEN1* KO neurons by EEN1 WT and  
1104 mutants. AAV viruses expressing the Cre recombinase (AAV-mCherry-2A-Cre) and GFP  
1105 (AAV-EGFP) or Cre, GFP and EEN1 WT or mutant (AAV-EGFP-2A-EEN1) were  
1106 stereotaxically injected into the CA1 regions of *EEN1<sup>fl/fl</sup>* mice at P0. Acute slices of  
1107 hippocampi were prepared on P14-P21 for dual recording analysis of LTP. Shown are  
1108 pairwise comparisons of LTP in non-infected (Ctrl) and infected neurons of the same slice.  
1109 For Cre-expressing neurons (Cre) versus Ctrl in (A), 6 recording pairs from three mice,  
1110 marked as N = 6/3, were analyzed. N = 10/5 in (B), N = 5/4 in (C), N = 5/3 in (D) and N =  
1111 4/3 in (E). Bar graphs shown percentage of baseline at 45 min after pairing. A summary of  
1112 rescue effects of EEN1 WT and mutants is shown in (F). Data represent mean  $\pm$  SEM. \*  $p$   
1113 < 0.05, \*\*  $p$  < 0.01. (G) AAV virus was stereotaxically injected into the CA1 regions of  
1114 *EEN1<sup>+/+</sup>* to express GFP alone, or *EEN1<sup>-/-</sup>* mice to express GFP alone, EEN1 WT, KKK-EEE,  
1115 Y343A or DM and GFP. Shown are images of GFP fluorescent signals and DAPI labeling of  
1116 nuclei captured by fluorescence microscopy. Bar = 1 mm. (H) Immunofluorescence staining  
1117 of endophilin A1 in CA1 neurons of brain slices from mice in (G). Bar = 50  $\mu$ m. (I-N) Morris  
1118 water maze test of AAV-injected mice. Shown are escape latency or distance travelled before  
1119 escaping to the platform in the visible platform training (I), escape latency and distance  
1120 travelled before escaping to the platform in the invisible platform training (J), the swim trace  
1121 in probe trial 3 and recall following training once again one month after training (K, L),  
1122 number of crossings within the 1.5 $\times$  platform area in 5-day probe trial and recall test (M), and  
1123 number of crossings within the 1.5 $\times$  platform area before and after recall (N). (O) Freezing  
1124 behavior in AAV-injected *EEN1<sup>+/+</sup>* or *EEN1<sup>-/-</sup>* mice subjected to contextual fear conditioning.

1125 Data represent mean  $\pm$  SEM in H-O (15 *EENI*<sup>+/+</sup> + GFP, 10 *EENI*<sup>-/-</sup> + GFP, 6 *EENI*<sup>-/-</sup> +  
1126 *EEN1*, 6 *EENI*<sup>-/-</sup> + Y343A, 7 *EENI*<sup>-/-</sup> + KKK-EEE, 7 *EENI*<sup>-/-</sup> + DM), \*  $p < 0.05$ , \*\*  $p < 0.01$ ,  
1127 \*\*\*  $p < 0.001$  when compared with *EENI*<sup>+/+</sup> + GFP, #  $p < 0.05$ , ##  $p < 0.01$ , ###  $p < 0.001$   
1128 when compared with *EENI*<sup>-/-</sup> + GFP; &  $p < 0.05$ , &&  $p < 0.01$  when compared with before  
1129 recall.  
1130



1131

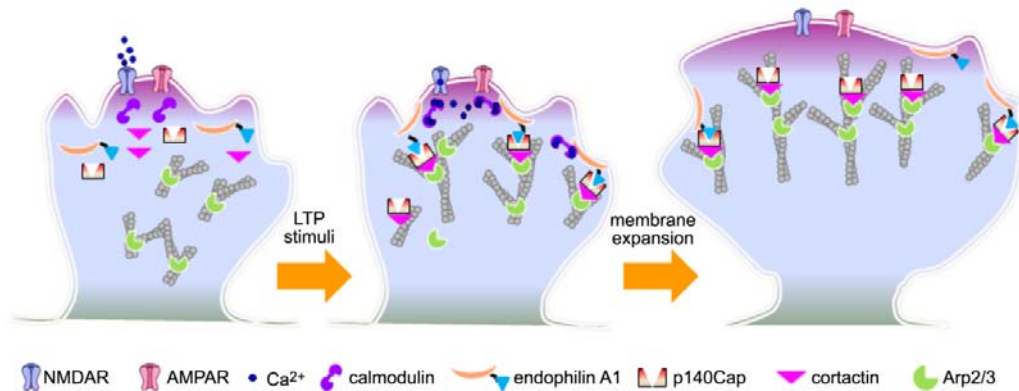

1133 **Figure 8.** Model for endophilin A1-mediated initial expansion of spine head in sLTP.

1134 LTP stimuli induce NMDAR-mediated Ca<sup>2+</sup> influx into dendritic spines and activation of  
1135 calmodulin. Ca<sup>2+</sup>/calmodulin interacts directly with endophilin A1 and enhance its binding to  
1136 both the plasma membrane and p140Cap. As a result, the plasma membrane-associated  
1137 endophilin A1 recruits p140Cap, which in turn recruits cortactin to promote branched actin  
1138 polymerization underneath the plasma membrane, generating propulsive force for rapid  
1139 structural expansion of spine head during the initial phase of sLTP.
